# Supplementary material
Source: PubMed Central journal article supplement (PMC8049356)
Supplement: NIHMS1675287-supplement-Supplementary_Figures.pdf [file NIHMS1675287-supplement-Supplementary_Figures.pdf]

# Supplemental Figure 1. Sub-Saharan African countries with high double burden of malnutrition\* in the 1990s and 2010s by time period and GDP/capita (PPP) quartile\*\*

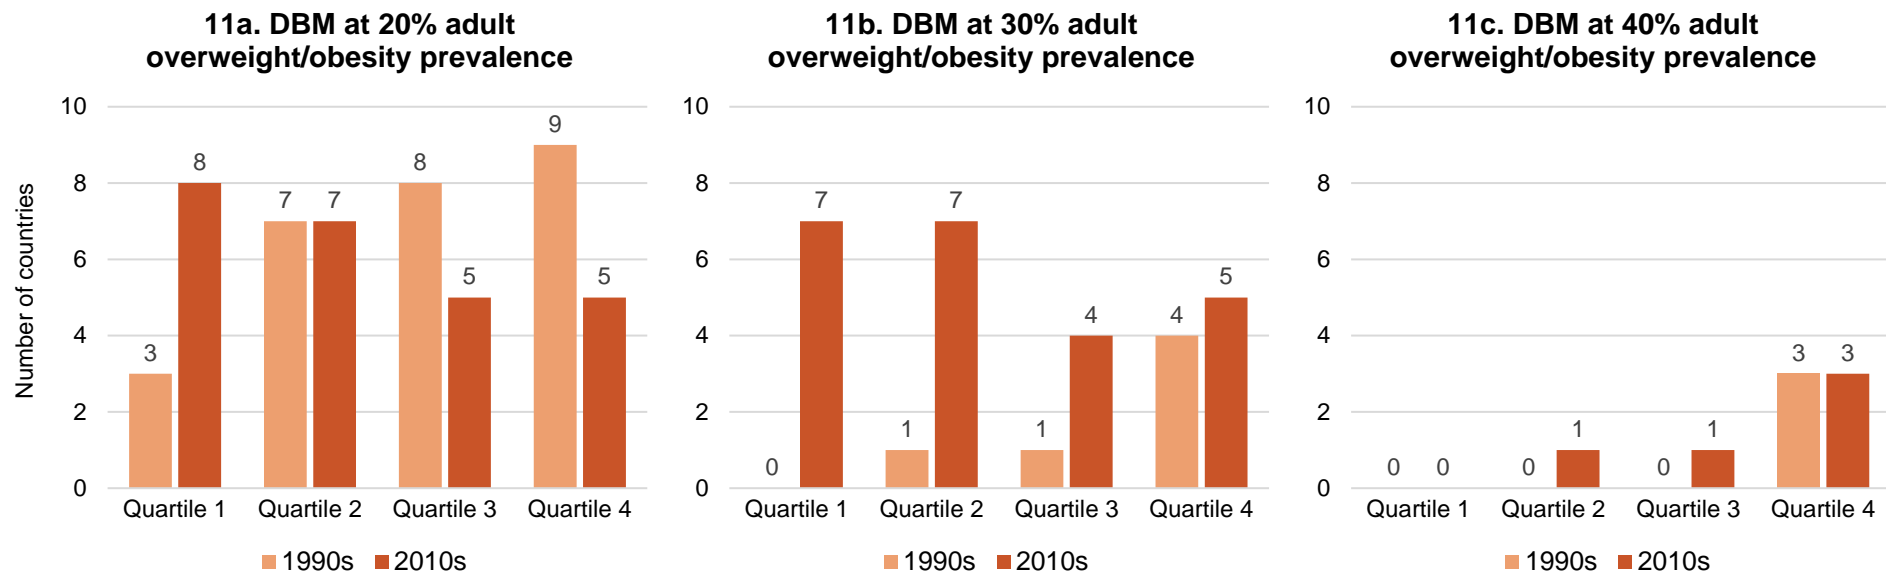

\* DBM= at least 1 child, adolescent, or adult in a household with a severe levels of wasting/stunting/thinness and 1 with overweight/obesity (shown at 20%, 30%, or 40% adult overweight/obesity prevalence); only includes countries with DBM data available for both time periods (1990s and 2010s).

\*\* Quartile 1 is lowest wealth, quartile 4 is highest wealth.

Source: Based on UNICEF, WHO, World Bank, and NCD-RisC estimates supplemented with selected DHS and other country direct measures for the 1990s.

# Supplemental Figure 2. Changes in prevalence of stunting\* among children (ages 0–4 years) in sub-Saharan Africa, 1990s to most recent survey year

## 2a. Stunting earliest and latest survey year prevalence

## 2b. Annualized change in stunting prevalence

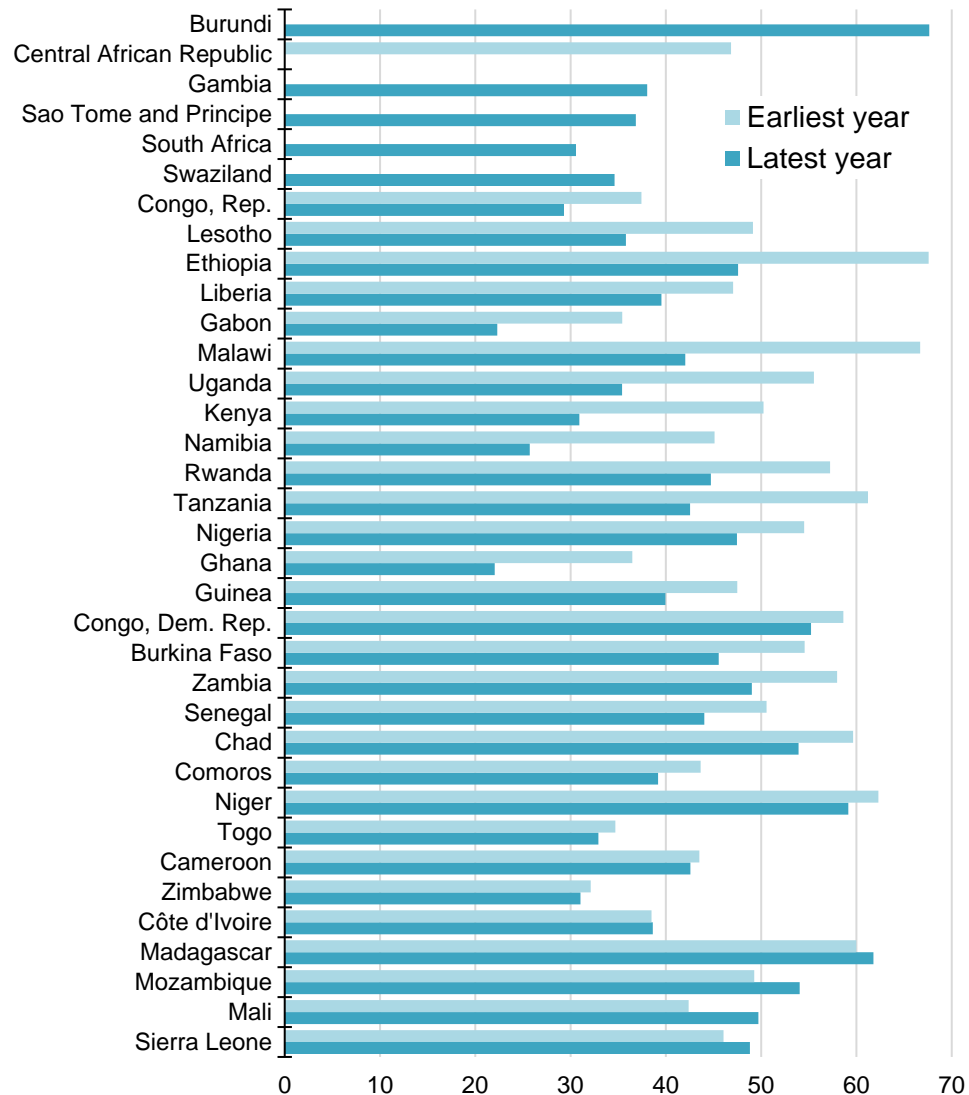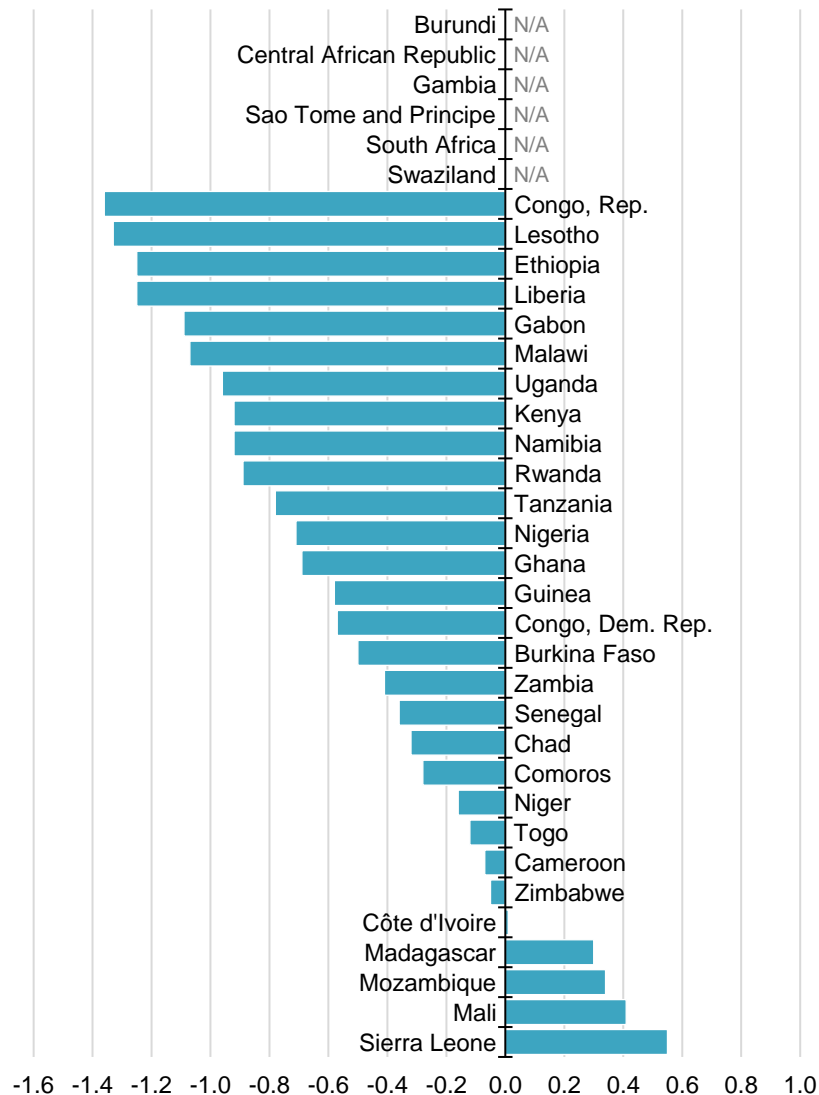

Stunting prevalence in earliest and latest survey years

Annualized change

# Supplemental Figure 3. Changes in prevalence of wasting among children (ages 0–4 years) in sub-Saharan Africa, 1990s to most recent survey year

### 3a. Wasting earliest and latest survey year prevalence

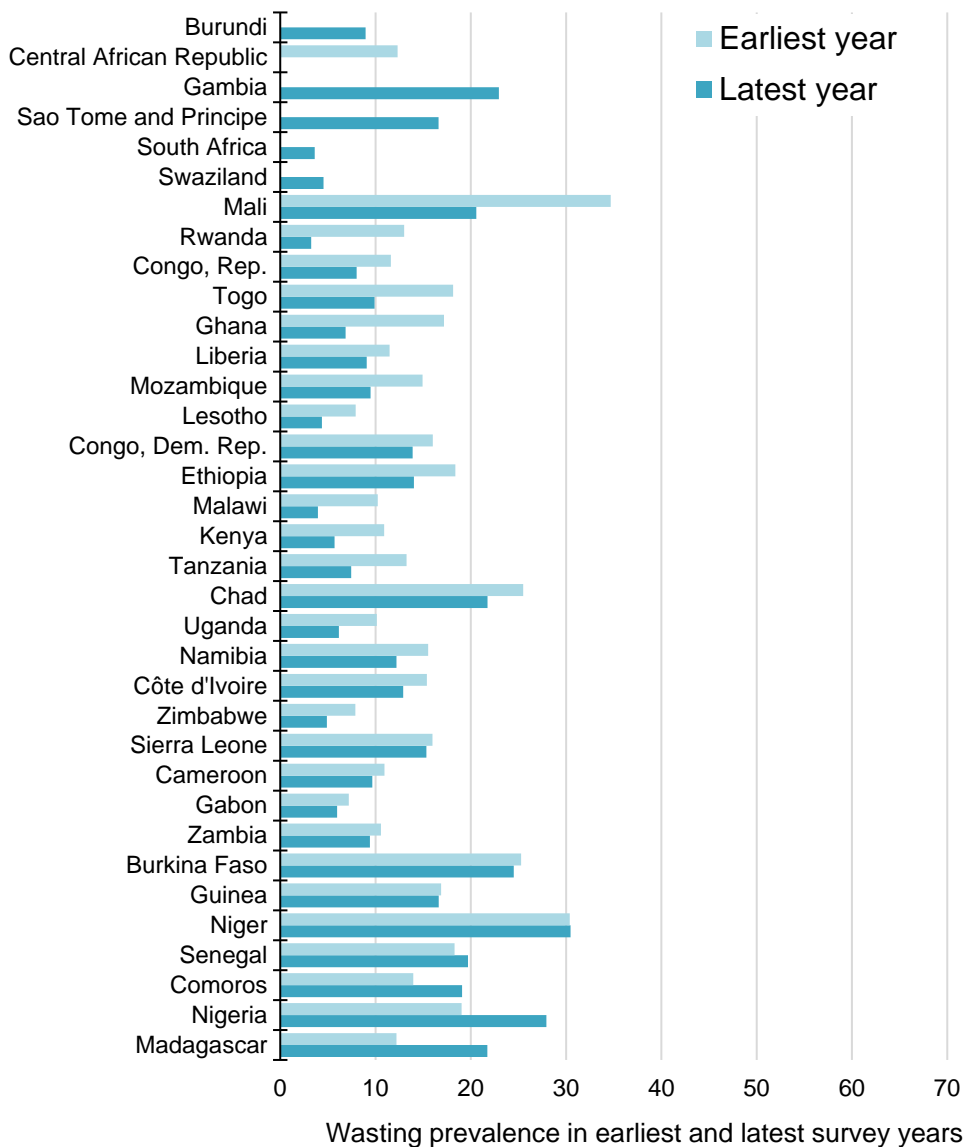

### 3b. Annualized change in wasting prevalence

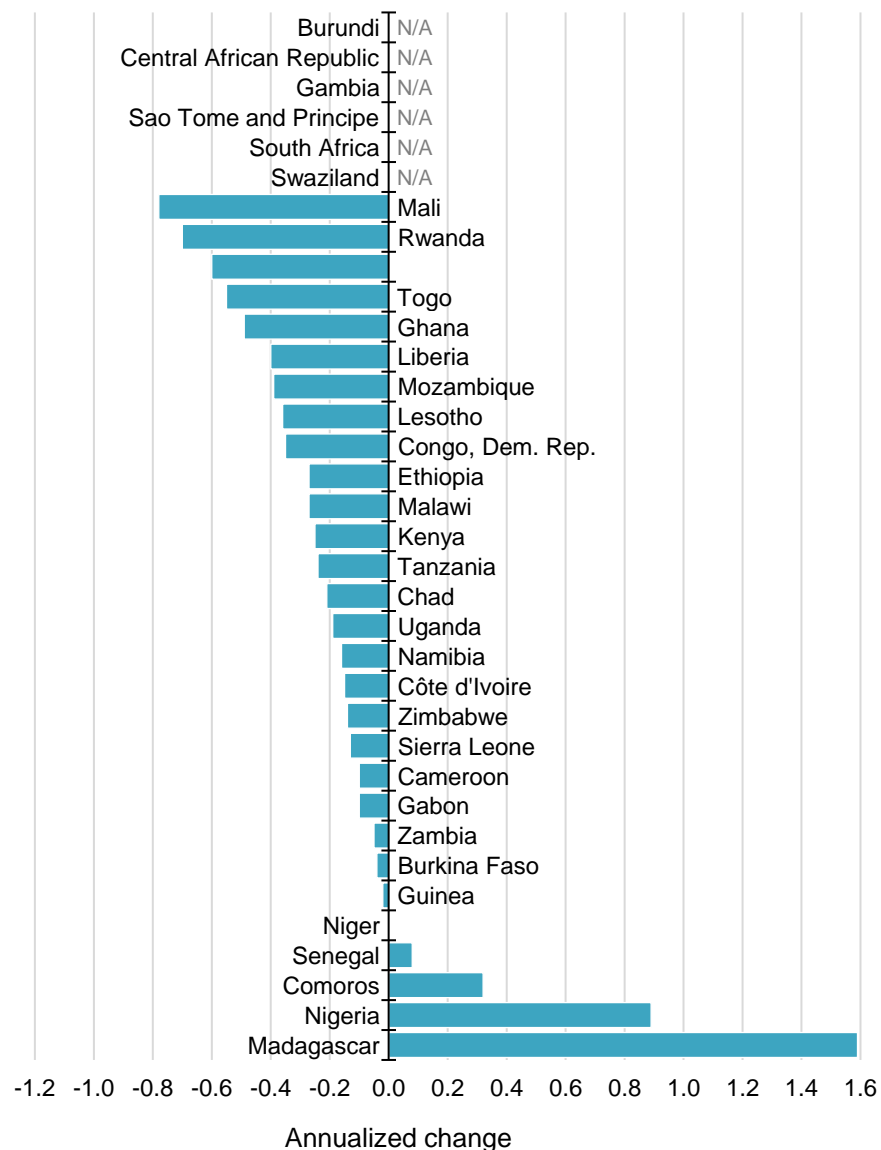

# Supplemental Figure 4. Changes in prevalence of thinness among women (ages 15–49 years) in sub-Saharan Africa, 1990s to most recent survey year

## 4a. Thinness earliest and latest survey year prevalence

## 4b. Annualized change in thinness prevalence

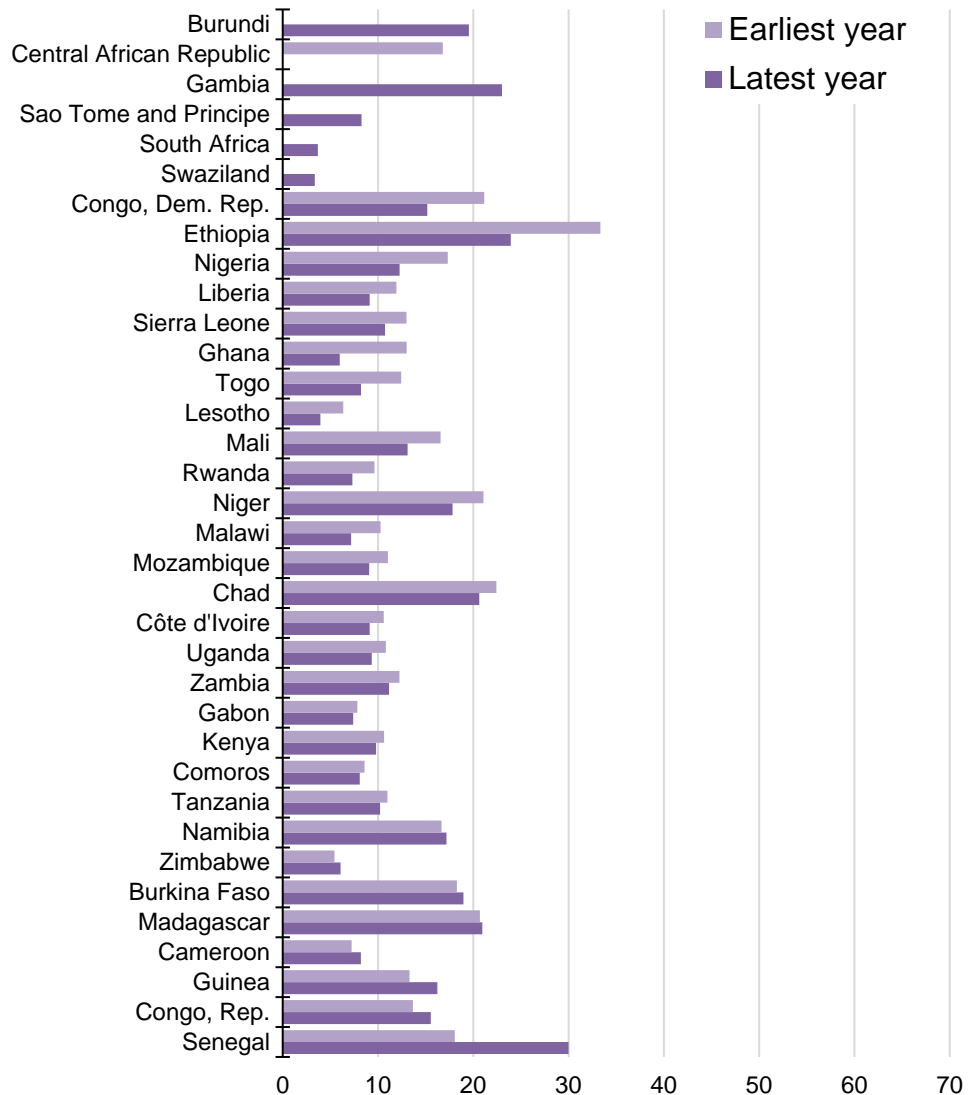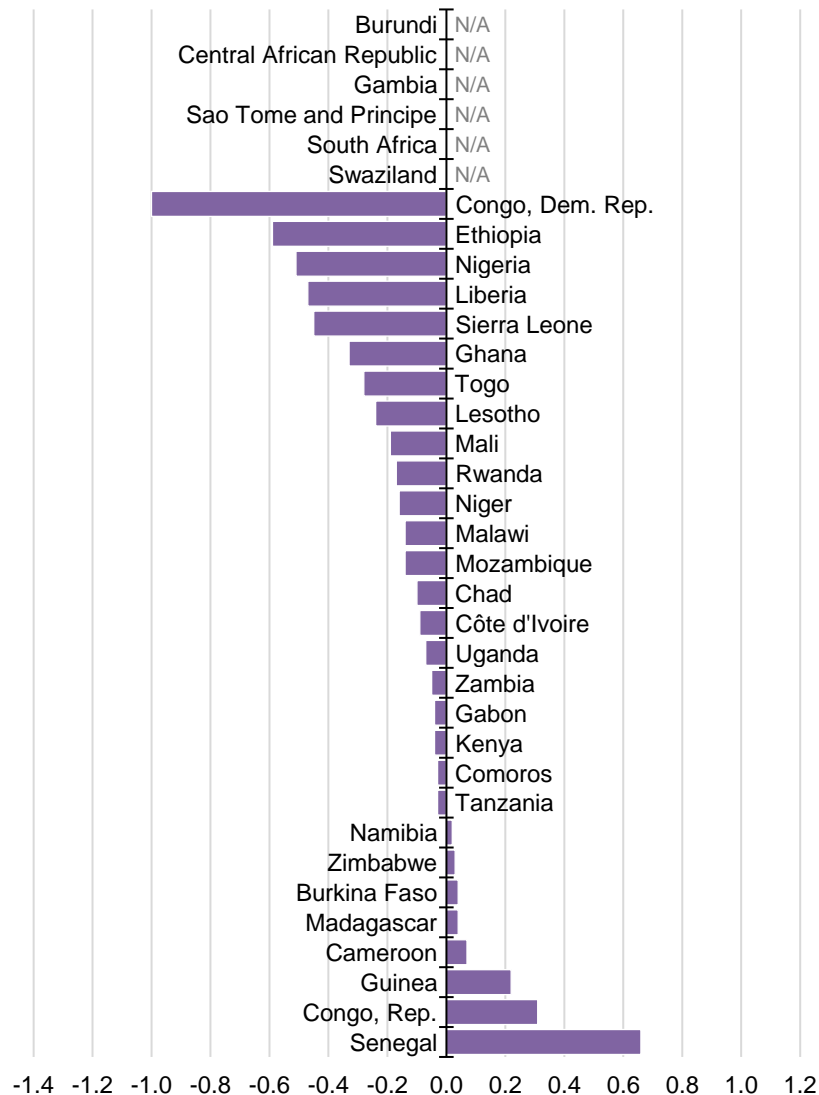

Thinness prevalence in earliest and latest survey years

Annualized change

# Supplemental Figure 5. Changes in prevalence of overweight/obesity among women (ages 15–49 years) in sub-Saharan Africa, 1990s to most recent survey year

## 5a. Overweight/obesity prevalence in earliest and latest survey years

## 5b. Annualized change in overweight/obesity prevalence

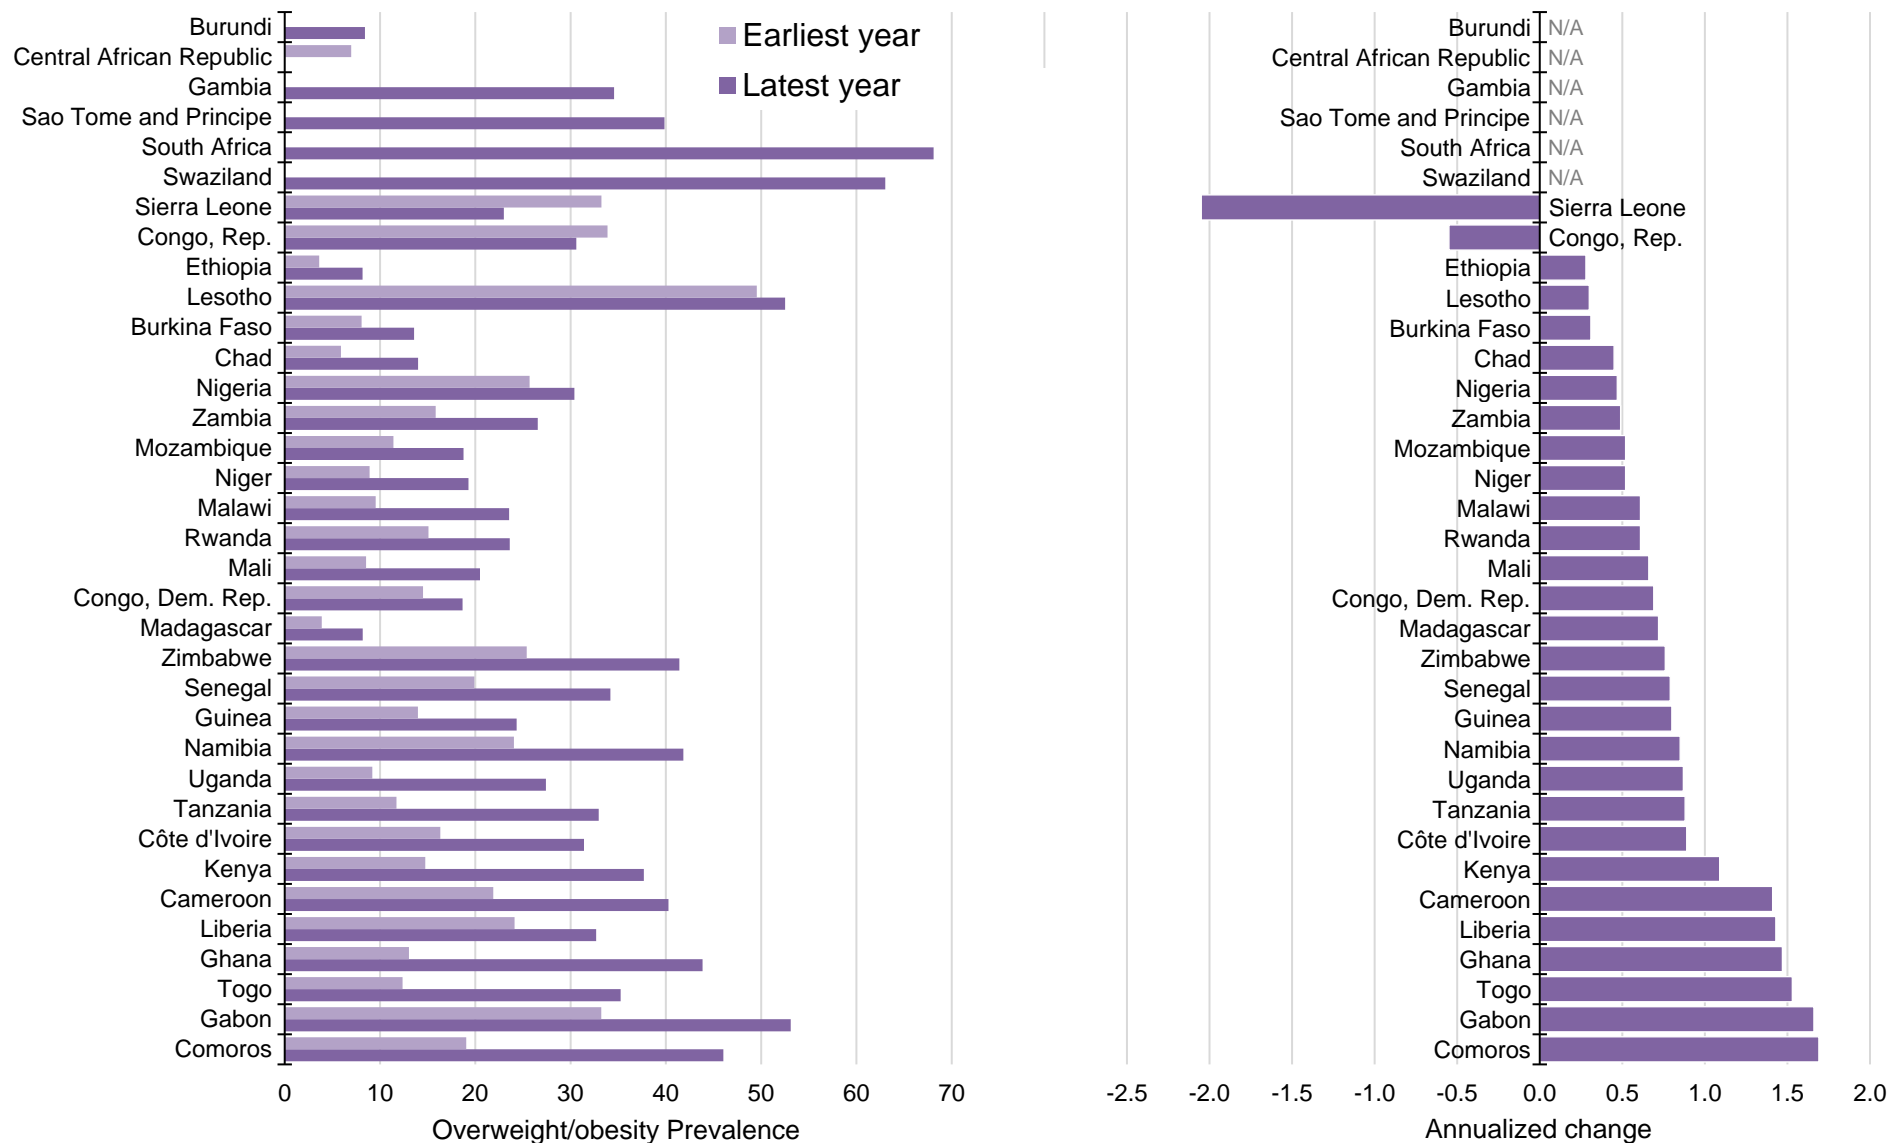

Source: Demographic and Health Surveys

# Supplemental Figure 6. Prevalence of overweight/obesity among women\* in the lowest socioeconomic quintile in earliest and latest survey years in a sample of sub-Saharan African countries\*\*

## 7a. Prevalence of overweight/obesity

## 7b. Annualized change in overweight/obesity prevalence

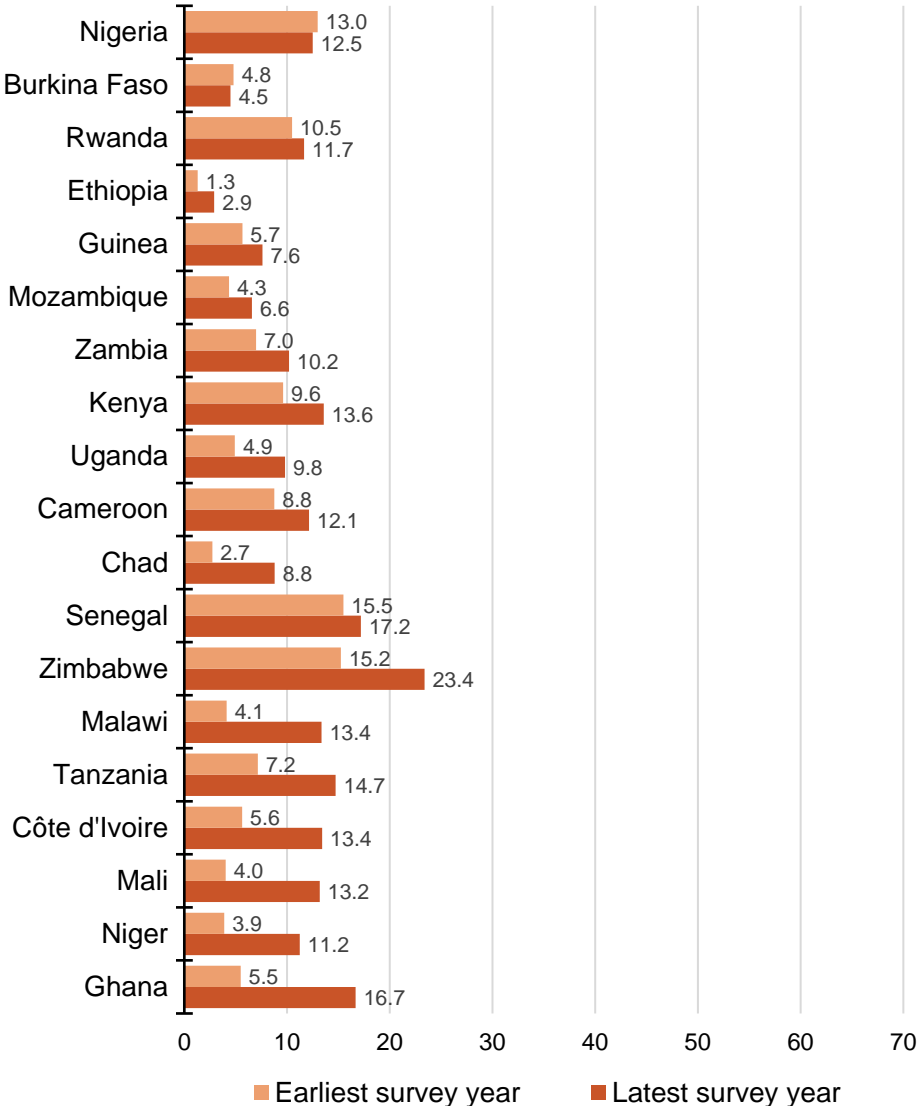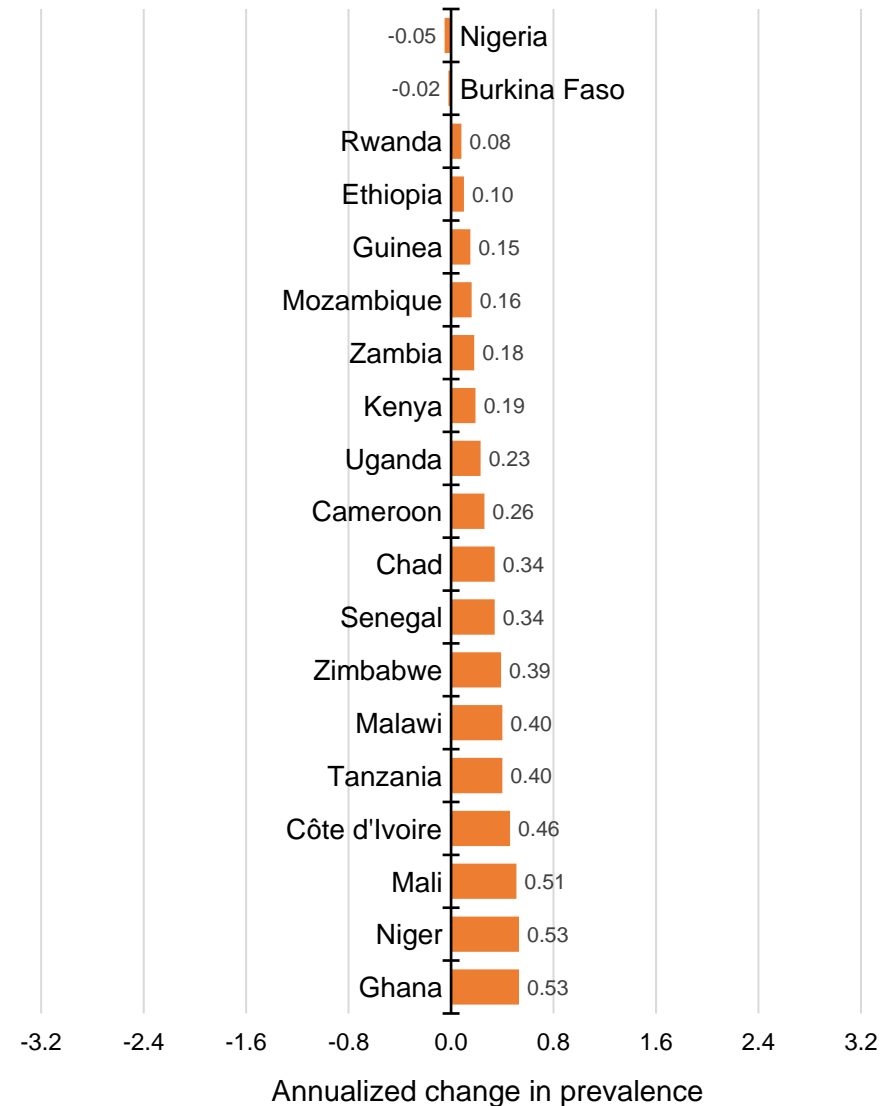

\* Adult women ages 15–49 years. \*\* Countries presented here had earliest-to-latest survey year data spanning 10 or more years and a population greater than 10 million in latest survey years. Data are from years spanning 1992 to 2016, but exact years vary by country. The span ranges from 10 years in Nigeria to 24 years in Tanzania.

# Supplemental Figure 7. Prevalence of overweight/obesity among women\* in the highest socioeconomic quintile in earliest and latest survey years in a sample of sub-Saharan African countries\*\*

## 8a. Prevalence of overweight/obesity

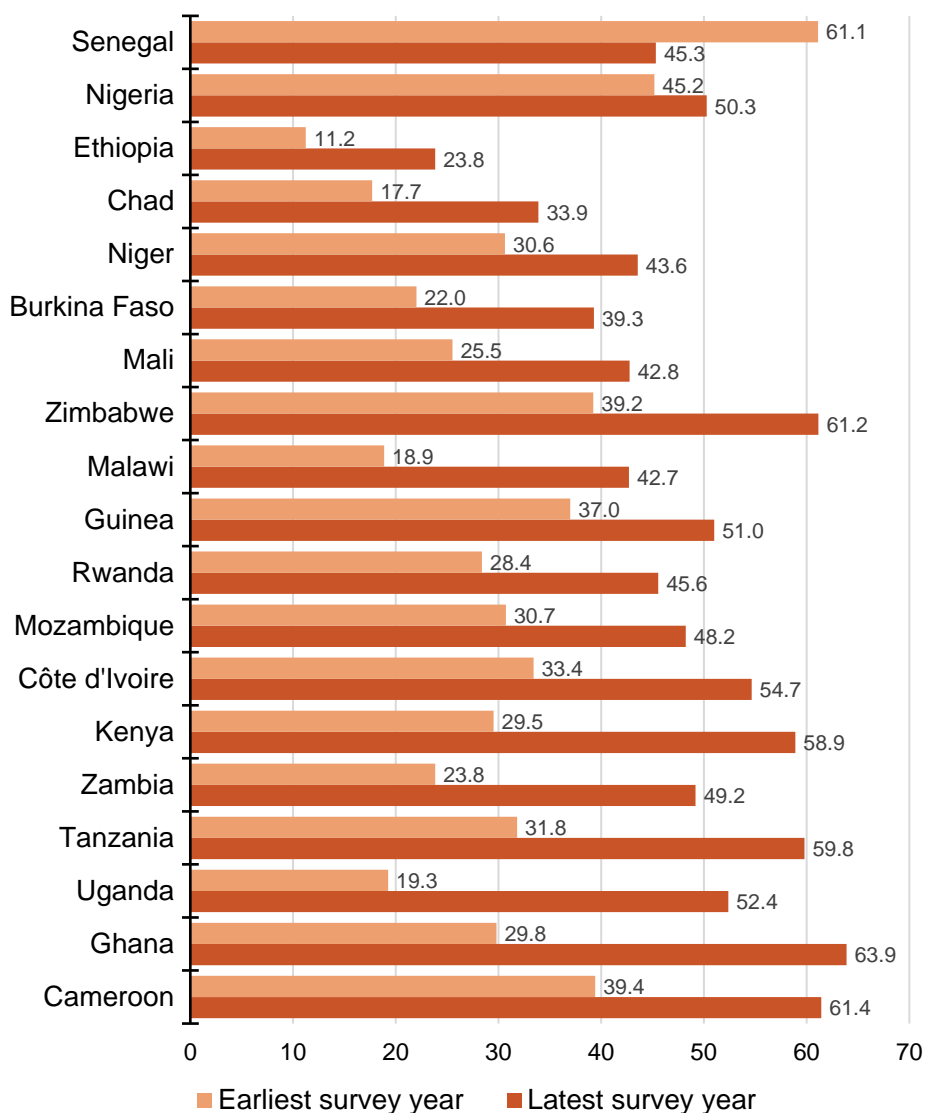

## 8b. Annualized change in overweight/obesity prevalence

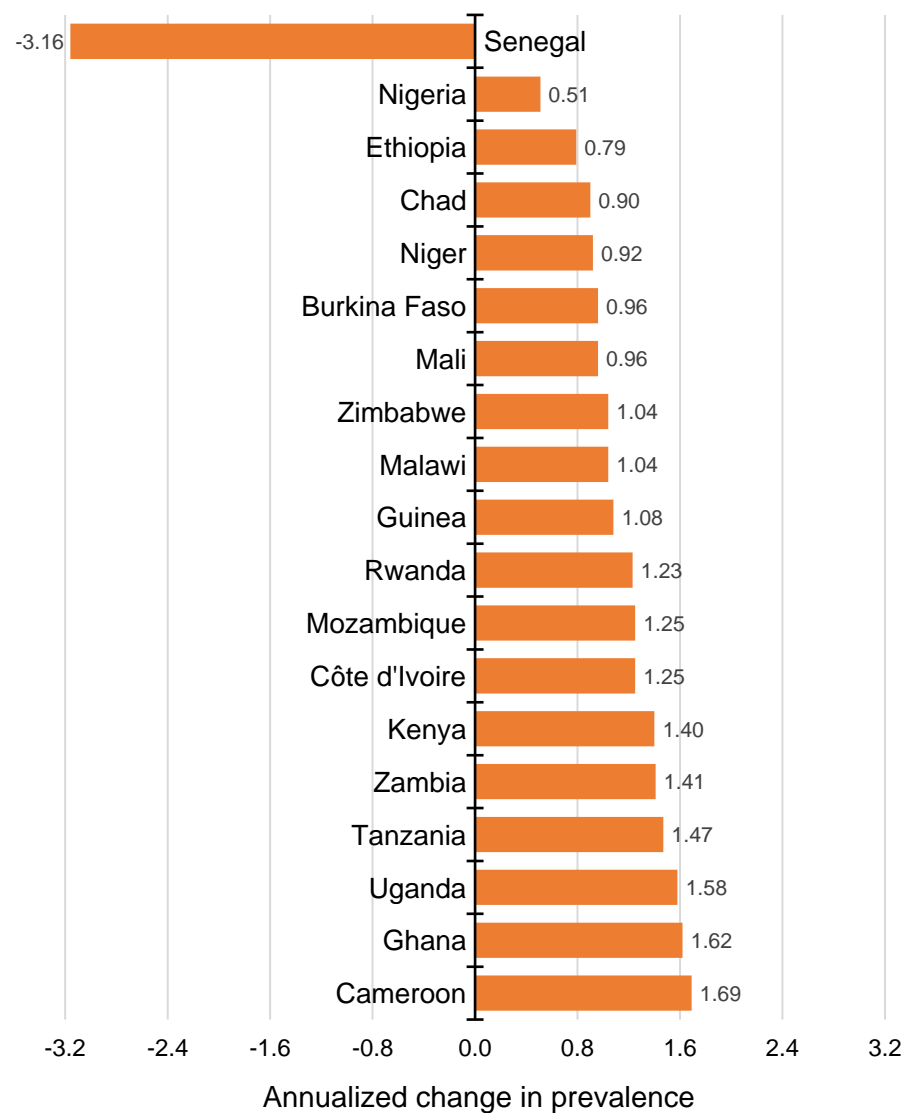

\* Adult women ages 15–49 years \*\* Countries presented here had earliest-to-latest survey year data spanning 10 or more years and a population greater than 10 million in latest survey years. Data are from years spanning 1992 to 2016, but exact years vary by country. The span ranges from 10 years in Nigeria to 24 years in Tanzania..

Source: Demographic and Health Surveys
