# Supplementary material
Source: PubMed Central journal article supplement (PMC8049356)
Supplement: NIHMS1675287-supplement-Supplementary_Tables.pdf [file NIHMS1675287-supplement-Supplementary_Tables.pdf]

**Supplemental Table 1. Total estimated daily per capita components of ultraprocessed foods: SSB\* and junk food\*\* sales in Nigeria and South Africa and annualized change in sales, 2004–2018**

| Country | Category                              | 2004  | 2005  | 2006  | 2007  | 2008  | 2009  | 2010  | 2011  | 2012  | 2013  | 2014  | 2015  | 2016  | 2017  | 2018  | Annualized change |
|---------|---------------------------------------|-------|-------|-------|-------|-------|-------|-------|-------|-------|-------|-------|-------|-------|-------|-------|-------------------|
| Nigeria | SSB (milliliters per capita per day)  | 22.5  | 24.9  | 24.1  | 24.4  | 26.0  | 27.9  | 29.6  | 31.0  | 31.0  | 33.2  | 34.5  | 36.2  | 36.2  | 35.9  | 37.0  | 1.0               |
|         | Junk foods (grams per capita per day) | 3.0   | 2.7   | 3.6   | 3.3   | 3.0   | 3.0   | 3.0   | 3.3   | 3.3   | 3.6   | 3.8   | 3.8   | 3.0   | 3.6   | 3.6   | 0.0               |
| South   | SSB (milliliters per capita per day)  | 153.4 | 162.2 | 170.7 | 181.6 | 186.0 | 191.5 | 198.6 | 203.6 | 210.1 | 214.8 | 222.2 | 236.4 | 249.0 | 255.1 | 260.3 | 7.1               |
| Africa  | Junk foods (grams per capita per day) | 19.7  | 20.0  | 20.0  | 21.6  | 21.9  | 23.3  | 22.7  | 23.0  | 23.8  | 24.4  | 24.9  | 25.8  | 26.3  | 26.6  | 27.4  | 0.5               |

Source: Euromonitor International Limited 2019 © All rights reserved. Nonmodeled sales volume data were only available for Nigeria and South Africa.

\* SSB (sugar-sweetened beverage) categories include regular cola carbonates, noncola carbonates (lemonade/lime, ginger ale, tonic water/other bitters, orange, and other noncola carbonates), juice drinks (up to 24% juice), nectars, ready-to-drink tea, energy drinks, and sports drinks.

\*\* Junk food categories include (when available) cakes, pastries, confectioneries, chilled and shelf-stable desserts and snacks, frozen desserts, ice cream, flavored yogurts, sweet biscuits, snack bars, processed fruit snacks, salty snacks, savory biscuits, popcorn, and other savory snacks.

**Supplemental Table 2. GDP/capita (PPP) number of households with children and women, mean age for women**

| Region             | Country                           | Earliest year | Households N (#) Earliest Year    |                                 |                                                      |                    | 1990 GDP | Latest Year | Households N (#) Latest Year    |                                 |                                                      |                    |          |
|--------------------|-----------------------------------|---------------|-----------------------------------|---------------------------------|------------------------------------------------------|--------------------|----------|-------------|---------------------------------|---------------------------------|------------------------------------------------------|--------------------|----------|
|                    |                                   |               | Households with children (0-4 y*) | Households with women (15-49 y) | Households with children (0-4 y) and women (15-49 y) | Mean age for women |          |             | Households with children (0-4y) | Households with women (15-49 y) | Households with children (0-4 y) and women (15-49 y) | Mean age for women | 2010 GDP |
| Sub-Saharan Africa | Burkina Faso                      | 1992          | 2,728                             | 2,766                           | 2,490                                                | 29.4               | 332.62   | 2010        | 4,149                           | 5,197                           | 3,809                                                | 28.9               | 535.89   |
|                    | Burundi                           | —             | —                                 | —                               | —                                                    | —                  | 202.10   | 2010        | 2,294                           | 2,975                           | 1,972                                                | 27.7               | 241.79   |
|                    | Cameroon                          | 1998          | 1,479                             | 1,447                           | 1,327                                                | 26.9               | 915.50   | 2011        | 3,177                           | 4,700                           | 2,890                                                | 28.0               | 1,144.25 |
|                    | Central African Republic          | 1994          | 1,915                             | 1,806                           | 1,690                                                | 27.2               | 506.86   | —           | —                               | —                               | —                                                    | —                  | 451.26   |
|                    | Chad                              | 1996          | 3,546                             | 3,231                           | 3,033                                                | 27.8               | 289.23   | 2014        | 6,276                           | 7,634                           | 5,336                                                | 28.5               | 760.71   |
|                    | Comoros                           | 1996          | 827                               | 767                             | 725                                                  | 29.5               | 571.01   | 2012        | 1,771                           | 3,286                           | 1,595                                                | 27.7               | 739.51   |
|                    | Congo, Democratic Republic of the | 2007          | 2,307                             | 3,061                           | 2,026                                                | 28.8               | 256.82   | 2013        | 5,052                           | 6,099                           | 4,346                                                | 28.5               | 198.71   |
|                    | Congo, Republic of the            | 2005          | 2,826                             | 4,233                           | 2,618                                                | 28.0               | 1,171.56 | 2011        | 2,982                           | 3,839                           | 2,718                                                | 28.7               | 2,970.12 |
|                    | Côte d'Ivoire                     | 1994          | 2,500                             | 2,441                           | 2,304                                                | 27.3               | 862.44   | 2011        | 2,103                           | 2,901                           | 1,898                                                | 28.5               | 1,161.26 |
|                    | Ethiopia                          | 2000          | 6,372                             | 10,258                          | 5,721                                                | 28.1               | 249.98   | 2016        | 6,402                           | 10,940                          | 5,764                                                | 28.3               | 320.38   |
|                    | Gabon                             | 2000          | 2,095                             | 2,034                           | 1,893                                                | 27.1               | 6,406.90 | 2012        | 2,191                           | 3,428                           | 1,976                                                | 28.9               | 8,767.83 |
|                    | Gambia                            | —             | —                                 | —                               | —                                                    | —                  | 900.00   | 2013        | 1,631                           | 2,111                           | 1,525                                                | 27.5               | 1,610.00 |
|                    | Ghana                             | 1993          | 1,735                             | 1,681                           | 1,601                                                | 28.8               | 398.09   | 2014        | 1,985                           | 3,457                           | 1,803                                                | 29.9               | 1,319.08 |
|                    | Guinea                            | 1999          | 2,844                             | 2,698                           | 2,572                                                | 29.0               | 463.00   | 2012        | 2,014                           | 2,710                           | 1,853                                                | 28.4               | 474.47   |
|                    | Kenya                             | 1993          | 3,290                             | 3,136                           | 2,900                                                | 28.7               | 365.60   | 2014        | 13,570                          | 10,783                          | 6,020                                                | 29.0               | 794.77   |
|                    | Lesotho                           | 2004          | 1,137                             | 2,435                           | 1,076                                                | 28.6               | 329.91   | 2014        | 1,102                           | 2,590                           | 1,076                                                | 28.5               | 1,003.70 |
|                    | Liberia                           | 2007          | 3,103                             | 4,519                           | 2,766                                                | 29.7               | 180.72   | 2013        | 2,177                           | 3,143                           | 2,020                                                | 28.8               | 323.65   |
|                    | Madagascar                        | 1997          | 2,670                             | 2,518                           | 2,352                                                | 27.6               | 273.17   | 2003        | 3,290                           | 5,778                           | 2,975                                                | 29.8               | 426.63   |
|                    | Malawi                            | 1992          | 2,296                             | 2,216                           | 1,976                                                | 29.1               | 200.49   | 2015        | 4,128                           | 6,041                           | 3,830                                                | 28.3               | 362.30   |
|                    | Mali                              | 1995          | 4,035                             | 3,819                           | 3,572                                                | 28.3               | 279.17   | 2013        | 2,882                           | 3,536                           | 2,537                                                | 29.0               | 613.04   |
|                    | Mozambique                        | 1997          | 3,092                             | 3,025                           | 2,827                                                | 27.3               | 181.83   | 2011        | 6,595                           | 9,416                           | 5,927                                                | 28.9               | 393.72   |
|                    | Namibia                           | 1992          | 1,647                             | 1,764                           | 1,520                                                | 29.1               | 1,661.19 | 2013        | 1,379                           | 3,255                           | 1,322                                                | 33.2               | 4,875.97 |
|                    | Niger                             | 1992          | 2,877                             | 2,775                           | 2,537                                                | 28.0               | 318.52   | 2012        | 2,916                           | 3,381                           | 2,552                                                | 29.1               | 348.80   |
|                    | Nigeria                           | 2003          | 2,987                             | 4,660                           | 2,654                                                | 28.1               | 291.87   | 2013        | 16,545                          | 24,707                          | 14,581                                               | 29.0               | 1,443.21 |
|                    | Rwanda                            | 2000          | 4,368                             | 6,676                           | 3,876                                                | 28.2               | 358.70   | 2014        | 2,764                           | 4,602                           | 2,554                                                | 28.7               | 529.41   |
|                    | Sao Tome and Principe             | —             | —                                 | —                               | —                                                    | —                  | 660.62   | 2008        | 1,239                           | 1,766                           | 1,081                                                | 29.3               | 1,215.49 |
|                    | Senegal                           | 1992          | 2,195                             | 2,035                           | 1,965                                                | 29.3               | 789.42   | 2010        | 1,878                           | 2,384                           | 1,771                                                | 28.0               | 1,033.91 |
|                    | Sierra Leone                      | 2008          | 1,597                             | 2,484                           | 1,461                                                | 29.6               | 163.16   | 2013        | 3,212                           | 4,800                           | 3,002                                                | 28.8               | 325.48   |
|                    | South Africa                      | —             | —                                 | —                               | —                                                    | —                  | —        | 2016        | 904                             | 2,451                           | 866                                                  | 30.3               | 7,271.73 |
|                    | Swaziland                         | —             | —                                 | —                               | —                                                    | —                  | 1,292.06 | 2006        | 1,489                           | 3,037                           | 1,423                                                | 27.9               | 3,503.16 |
|                    | Tanzania                          | 1991          | 4,124                             | 3,886                           | 3,641                                                | 28.6               | 171.91   | 2015        | 5,979                           | 8,753                           | 5,527                                                | 28.9               | 526.56   |
|                    | Togo                              | 1998          | 2,964                             | 2,845                           | 2,731                                                | 29.2               | 444.26   | 2013        | 2,156                           | 3,136                           | 1,964                                                | 29.5               | 529.65   |
| Uganda             | 1995                              | 3,368         | 3,033                             | 2,844                           | 27.2                                                 | 243.19             | 2016     | 3,006       | 4,205                           | 2,701                           | 28.2                                                 | 514.51             |          |
| Zambia             | 1992                              | 3,165         | 2,914                             | 2,724                           | 27.9                                                 | 418.37             | 2014     | 8,123       | 11,114                          | 7,446                           | 28.5                                                 | 1,252.49           |          |
| Zimbabwe           | 1994                              | 1,865         | 1,839                             | 1,711                           | 27.5                                                 | 839.01             | 2015     | 3,933       | 6,931                           | 3,734                           | 28.6                                                 | 591.29             |          |

Source: All data are from the DHS (<https://dhsprogram.com>).

\* y = years

**Supplemental Table 3. Prevalence<sup>1</sup> of household double burdens for children with underweight (ages 0–4 years) and women with overweight (ages 15–49 years) and annualized change in prevalence for earliest to latest survey years**

| Region               | Country                           | Overweight and stunting in a single child |             |                   |                                   |             |                   |                                    |             |                   | Total double burden                          |             |                   |                                                                     |             |                   |  |  |  |
|----------------------|-----------------------------------|-------------------------------------------|-------------|-------------------|-----------------------------------|-------------|-------------------|------------------------------------|-------------|-------------------|----------------------------------------------|-------------|-------------------|---------------------------------------------------------------------|-------------|-------------------|--|--|--|
|                      |                                   | Overweight and stunting in a single child |             |                   | Overweight woman and wasted child |             |                   | Overweight woman and stunted child |             |                   | Overweight woman and wasted or stunted child |             |                   | Overweight woman or child and wasted or stunted child or thin woman |             |                   |  |  |  |
|                      |                                   | Earliest year                             | Latest year | Annualized change | Earliest year                     | Latest year | Annualized change | Earliest year                      | Latest year | Annualized change | Earliest year                                | Latest year | Annualized change | Earliest year                                                       | Latest year | Annualized change |  |  |  |
| Sub-Saharan Africa   | Burkina Faso                      | 3.3                                       | 3.3         | 0.00              | 1.4                               | 1.6         | 0.01              | 3.6                                | 3.4         | -0.01             | 4.1                                          | 4.4         | 0.02              | 7.1                                                                 | 7.3         | 0.01              |  |  |  |
|                      | Burundi                           |                                           | 3.4         |                   |                                   | 0.9         |                   |                                    | 4.3         |                   |                                              | 4.8         |                   |                                                                     | 7.6         |                   |  |  |  |
|                      | Cameroon                          | 5.0                                       | 5.2         | 0.02              | 1.5                               | 2.1         | 0.04              | 6.9                                | 11.7        | 0.37              | 7.8                                          | 12.9        | 0.40              | 12.5                                                                | 17.7        | 0.40              |  |  |  |
|                      | Central African Republic          | 3.3                                       |             |                   | 0.7                               |             |                   | 3.1                                |             |                   | 3.3                                          |             |                   | 7.6                                                                 |             |                   |  |  |  |
|                      | Chad                              | 3.3                                       | 2.9         | -0.03             | 0.9                               | 1.6         | 0.04              | 2.9                                | 5.6         | 0.15              | 3.3                                          | 6.5         | 0.18              | 7.0                                                                 | 10.2        | 0.18              |  |  |  |
|                      | Comoros                           | 3.8                                       | 10.5        | 0.42              | 2.6                               | 9.2         | 0.42              | 6.9                                | 16.7        | 0.62              | 8.0                                          | 23.2        | 0.95              | 12.5                                                                | 28.6        | 1.00              |  |  |  |
|                      | Congo, Democratic Republic of the | 13.0                                      | 5.8         | -1.19             | 1.6                               | 1.6         | -0.01             | 6.4                                | 6.4         | 0.00              | 7.3                                          | 7.2         | -0.01             | 17.7                                                                | 12.7        | -0.83             |  |  |  |
|                      | Congo, Republic of the            | 8.0                                       | 2.7         | -0.89             | 2.8                               | 1.8         | -0.16             | 10.3                               | 4.3         | -0.99             | 11.9                                         | 6.0         | -0.99             | 18.0                                                                | 8.9         | -1.51             |  |  |  |
|                      | Côte d'Ivoire                     | 1.6                                       | 2.3         | 0.04              | 1.9                               | 2.4         | 0.03              | 4.4                                | 8.3         | 0.23              | 5.1                                          | 9.7         | 0.27              | 6.6                                                                 | 11.5        | 0.29              |  |  |  |
|                      | Ethiopia                          | 1.9                                       | 2.9         | 0.07              | 0.3                               | 0.5         | 0.01              | 0.8                                | 1.6         | 0.05              | 1.0                                          | 1.9         | 0.05              | 3.5                                                                 | 6.0         | 0.16              |  |  |  |
|                      | Gabon                             | 4.0                                       | 4.8         | 0.07              | 1.6                               | 3.8         | 0.18              | 7.4                                | 8.8         | 0.11              | 8.2                                          | 11.3        | 0.26              | 11.8                                                                | 15.1        | 0.28              |  |  |  |
|                      | Gambia                            |                                           | 5.9         |                   |                                   | 5.4         |                   |                                    | 10.3        |                   |                                              | 12.9        |                   |                                                                     | 19.2        |                   |  |  |  |
|                      | Ghana                             | 1.6                                       | 1.3         | -0.01             | 2.0                               | 1.6         | -0.02             | 3.4                                | 5.6         | 0.11              | 4.7                                          | 6.9         | 0.11              | 6.5                                                                 | 8.6         | 0.10              |  |  |  |
|                      | Guinea                            | 4.9                                       | 3.6         | -0.11             | 1.8                               | 2.5         | 0.05              | 5.0                                | 8.5         | 0.27              | 6.2                                          | 10.0        | 0.29              | 10.8                                                                | 13.6        | 0.22              |  |  |  |
|                      | Kenya                             | 4.4                                       | 2.1         | -0.11             | 0.7                               | 1.0         | 0.02              | 6.1                                | 8.0         | 0.09              | 6.0                                          | 8.5         | 0.12              | 10.5                                                                | 10.8        | 0.01              |  |  |  |
|                      | Lesotho                           | 7.0                                       | 4.3         | -0.27             | 3.3                               | 2.1         | -0.12             | 22.4                               | 16.0        | -0.64             | 24.8                                         | 17.5        | -0.73             | 28.3                                                                | 20.1        | -0.82             |  |  |  |
|                      | Liberia                           | 4.4                                       | 3.4         | -0.16             | 2.7                               | 2.1         | -0.09             | 8.9                                | 10.9        | 0.33              | 10.5                                         | 11.9        | 0.24              | 14.2                                                                | 16.1        | 0.32              |  |  |  |
|                      | Madagascar                        | 2.3                                       | 8.3         | 0.99              | 0.3                               | 0.7         | 0.06              | 1.5                                | 2.8         | 0.21              | 1.7                                          | 3.1         | 0.22              | 4.8                                                                 | 11.4        | 1.10              |  |  |  |
|                      | Malawi                            | 9.9                                       | 3.1         | -0.29             | 0.8                               | 0.8         | 0.00              | 5.6                                | 6.5         | 0.04              | 5.8                                          | 7.1         | 0.06              | 15.4                                                                | 9.6         | -0.25             |  |  |  |
|                      | Mali                              | 1.9                                       | 4.2         | 0.13              | 2.5                               | 3.4         | 0.05              | 2.8                                | 7.6         | 0.27              | 4.5                                          | 9.9         | 0.30              | 6.0                                                                 | 13.7        | 0.43              |  |  |  |
|                      | Mozambique                        | 5.9                                       | 8.8         | 0.20              | 2.2                               | 0.8         | -0.10             | 2.5                                | 6.7         | 0.30              | 4.4                                          | 7.0         | 0.19              | 9.6                                                                 | 15.8        | 0.44              |  |  |  |
|                      | Namibia                           | 4.4                                       | 2.6         | -0.08             | 3.3                               | 3.5         | 0.01              | 9.5                                | 7.7         | -0.09             | 10.9                                         | 10.6        | -0.01             | 15.7                                                                | 13.9        | -0.09             |  |  |  |
|                      | Niger                             | 2.3                                       | 4.2         | 0.10              | 2.2                               | 4.6         | 0.12              | 4.4                                | 8.9         | 0.23              | 5.2                                          | 10.8        | 0.28              | 7.8                                                                 | 14.7        | 0.34              |  |  |  |
|                      | Nigeria                           | 8.8                                       | 6.5         | -0.23             | 3.1                               | 5.8         | 0.27              | 10.1                               | 10.1        | 0.00              | 11.7                                         | 13.2        | 0.16              | 20.0                                                                | 19.4        | -0.06             |  |  |  |
|                      | Rwanda                            | 6.7                                       | 5.0         | -0.12             | 1.6                               | 0.3         | -0.10             | 6.7                                | 8.7         | 0.15              | 7.8                                          | 8.8         | 0.07              | 13.8                                                                | 13.5        | -0.02             |  |  |  |
|                      | Sao Tome and Principe             |                                           | 12.1        |                   |                                   | 7.9         |                   |                                    | 10.8        |                   |                                              | 17.9        |                   |                                                                     | 27.0        |                   |  |  |  |
|                      | Senegal                           | 4.6                                       | 4.8         | 0.01              | 3.7                               | 4.6         | 0.05              | 7.3                                | 10.1        | 0.16              | 8.9                                          | 12.6        | 0.21              | 14.4                                                                | 19.6        | 0.29              |  |  |  |
|                      | Sierra Leone                      | 11.8                                      | 9.9         | -0.38             | 3.4                               | 3.5         | 0.02              | 11.6                               | 9.3         | -0.47             | 13.4                                         | 11.1        | -0.47             | 23.4                                                                | 20.1        | -0.65             |  |  |  |
|                      | South Africa                      |                                           | 6.7         |                   |                                   | 1.6         |                   |                                    | 19.1        |                   |                                              | 20.3        |                   |                                                                     | 22.8        |                   |  |  |  |
|                      | Swaziland                         |                                           | 6.3         |                   |                                   | 2.5         |                   |                                    | 20.1        |                   |                                              | 22.0        |                   |                                                                     | 24.9        |                   |  |  |  |
|                      | Tanzania                          | 6.3                                       | 2.8         | -0.15             | 1.2                               | 1.4         | 0.01              | 5.5                                | 10.5        | 0.21              | 5.9                                          | 11.4        | 0.23              | 11.3                                                                | 14.0        | 0.12              |  |  |  |
|                      | Togo                              | 1.9                                       | 1.5         | -0.03             | 1.0                               | 1.7         | 0.05              | 3.3                                | 5.9         | 0.17              | 3.7                                          | 7.0         | 0.22              | 6.0                                                                 | 8.6         | 0.18              |  |  |  |
| Uganda               | 4.6                               | 2.0                                       | -0.12       | 0.3               | 0.7                               | 0.02        | 4.5               | 6.7                                | 0.11        | 4.5               | 7.3                                          | 0.14        | 9.4               | 9.5                                                                 | 0.01        |                   |  |  |  |
| Zambia               | 4.4                               | 6.1                                       | 0.08        | 1.4               | 2.0                               | 0.02        | 7.8               | 9.5                                | 0.08        | 8.3               | 11.0                                         | 0.12        | 12.1              | 16.5                                                                | 0.20        |                   |  |  |  |
| Zimbabwe             | 3.5                               | 3.5                                       | 0.00        | 2.3               | 1.1                               | -0.05       | 6.4               | 10.6                               | 0.20        | 8.4               | 11.2                                         | 0.14        | 11.1              | 13.4                                                                | 0.11        |                   |  |  |  |
| <b>Region Totals</b> |                                   | <b>5.9</b>                                | <b>4.7</b>  | <b>-0.16</b>      | <b>1.7</b>                        | <b>2.4</b>  | <b>0.07</b>       | <b>5.8</b>                         | <b>8.2</b>  | <b>0.09</b>       | <b>6.7</b>                                   | <b>9.6</b>  | <b>0.13</b>       | <b>12.2</b>                                                         | <b>14.0</b> | <b>0.02</b>       |  |  |  |

Source: All data are from the DHS (<https://dhsprogram.com>).

1. Nationally representative and regionally weighted.

Supplemental Table 4. Sub-Saharan African countries with high DBM\* by time period and GDP/capita (PPP) quartile\*\*

| Country                           | 1990 population    | 1990 GDP     | 1990 quartile | Early year double burden based on anthropometry*** |                  |                  | Most recent year double burden based on anthropometry*** |                  |                  | 2010 population    | 2010 GDP     | Changes from the 1990s to the 2010s: What happened from earliest survey year to most recent? |                  |                  |
|-----------------------------------|--------------------|--------------|---------------|----------------------------------------------------|------------------|------------------|----------------------------------------------------------|------------------|------------------|--------------------|--------------|----------------------------------------------------------------------------------------------|------------------|------------------|
|                                   |                    |              |               | > 40% overweight                                   | > 30% overweight | > 20% overweight | > 40% overweight                                         | > 30% overweight | > 20% overweight |                    |              | > 40% overweight                                                                             | > 30% overweight | > 20% overweight |
| Angola                            | 14,268,994         | 1,798        | Quartile 4    |                                                    |                  | HI               |                                                          |                  | HI               | 23,369,131         | 5,778        |                                                                                              |                  |                  |
| Benin                             | 5,905,558          | 1,105        | Quartile 3    |                                                    |                  |                  |                                                          |                  | HI               | 9,199,259          | 1,782        |                                                                                              |                  | +                |
| Botswana                          | 1,569,094          | 6,492        | Quartile 4    |                                                    |                  |                  |                                                          |                  | HI               | 2,014,866          | 13,064       |                                                                                              |                  | +                |
| Burkina Faso                      | 10,089,878         | 851          | Quartile 1    | HI                                                 | HI               |                  |                                                          |                  |                  | 15,605,217         | 1,395        |                                                                                              |                  |                  |
| Cameron                           | 13,460,994         | 1,738        | Quartile 4    |                                                    |                  |                  |                                                          |                  | HI               | 19,970,495         | 2,871        | +                                                                                            |                  | +                |
| Central African Republic          | 3,352,767          | 621          | Quartile 1    |                                                    |                  | HI               |                                                          |                  | HI               | 4,448,525          | 863          |                                                                                              |                  | +                |
| Chad                              | 7,000,722          | 759          | Quartile 2    |                                                    |                  |                  |                                                          |                  | HI               | 11,887,202         | 1,886        |                                                                                              |                  | +                |
| Comoros                           | 475,394            | 1,048        | Quartile 3    |                                                    |                  | HI               |                                                          |                  | HI               | 689,692            | 1,384        |                                                                                              |                  | +                |
| Côte d'Ivoire                     | 14,540,820         | 2,113        | Quartile 4    |                                                    |                  | HI               |                                                          |                  |                  | 20,401,331         | 2,636        |                                                                                              |                  |                  |
| Congo, Democratic Republic of the | 41,595,744         | 578          | Quartile 1    |                                                    |                  |                  |                                                          |                  | HI               | 64,523,263         | 647          |                                                                                              |                  | +                |
| Djibouti                          | 630,388            | 766          | Quartile 2    |                                                    | HI               | HI               |                                                          |                  | HI               | 851,146            | 1,326        | +                                                                                            |                  |                  |
| Equatorial Guinea                 | 504,871            | 1,251        | Quartile 3    |                                                    |                  | HI               |                                                          |                  |                  | 951,104            | 33,041       |                                                                                              |                  |                  |
| Eritrea                           | 3,090,159          | 1,156        | Quartile 3    |                                                    |                  |                  |                                                          |                  | HI               | 4,390,840          | 1,388        |                                                                                              |                  | +                |
| Ethiopia                          | 57,309,880         | 419          | Quartile 1    |                                                    |                  |                  |                                                          |                  | HI               | 87,702,670         | 1,052        |                                                                                              |                  | +                |
| Gambia                            | 1,066,223          | 1,048        | Quartile 2    |                                                    |                  | HI               |                                                          |                  |                  | 1,692,149          | 1,611        |                                                                                              |                  |                  |
| Ghana                             | 16,760,467         | 1,506        | Quartile 3    |                                                    |                  | HI               |                                                          |                  |                  | 24,512,104         | 2,997        |                                                                                              |                  |                  |
| Guinea                            | 7,871,173          | 957          | Quartile 2    |                                                    |                  | HI               |                                                          |                  | HI               | 10,794,170         | 1,542        |                                                                                              |                  | +                |
| Kenya                             | 27,346,456         | 1,607        | Quartile 3    |                                                    |                  | HI               |                                                          |                  |                  | 41,350,152         | 2,426        |                                                                                              |                  |                  |
| Lesotho                           | 1,761,359          | 1,187        | Quartile 3    |                                                    | HI               | HI               |                                                          |                  | HI               | 2,040,551          | 2,318        | +                                                                                            |                  |                  |
| Madagascar                        | 13,475,400         | 1,021        | Quartile 2    |                                                    |                  |                  |                                                          |                  | HI               | 21,151,640         | 1,358        |                                                                                              |                  | +                |
| Malawi                            | 9,909,088          | 598          | Quartile 1    |                                                    |                  |                  |                                                          |                  | HI               | 15,167,095         | 1,012        |                                                                                              |                  | +                |
| Mali                              | 9,604,450          | 955          | Quartile 2    |                                                    |                  | HI               |                                                          |                  | HI               | 15,075,085         | 1,834        |                                                                                              |                  | +                |
| Mauritania                        | 2,327,075          | 2,087        | Quartile 4    |                                                    |                  | HI               |                                                          |                  |                  | 3,609,543          | 3,250        |                                                                                              |                  |                  |
| Mozambique                        | 15,759,132         | 272          | Quartile 1    |                                                    |                  |                  |                                                          |                  | HI               | 24,221,405         | 899          |                                                                                              |                  | +                |
| Namibia                           | 1,655,359          | 4,298        | Quartile 4    |                                                    | HI               | HI               |                                                          |                  |                  | 2,173,170          | 8,290        |                                                                                              |                  |                  |
| Niger                             | 9,477,333          | 572          | Quartile 1    |                                                    |                  |                  |                                                          |                  | HI               | 16,425,578         | 798          |                                                                                              |                  | +                |
| Nigeria                           | 108,011,465        | 2,005        | Quartile 4    |                                                    |                  | HI               |                                                          |                  | HI               | 158,578,261        | 5,046        |                                                                                              |                  | +                |
| Rwanda                            | 5,928,078          | 495          | Quartile 1    |                                                    |                  |                  |                                                          |                  | HI               | 10,246,842         | 1,338        |                                                                                              |                  | +                |
| Senegal                           | 8,746,606          | 1,287        | Quartile 3    |                                                    |                  | HI               |                                                          |                  |                  | 12,916,229         | 2,588        |                                                                                              |                  |                  |
| Sierra Leone                      | 4,274,819          | 697          | Quartile 2    |                                                    |                  | HI               |                                                          |                  | HI               | 6,458,720          | 2,140        |                                                                                              |                  | +                |
| South Africa                      | 41,428,810         | 6,586        | Quartile 4    | HI                                                 | HI               | HI               |                                                          |                  |                  | 50,979,432         | 11,647       |                                                                                              |                  |                  |
| Tanzania                          | 29,960,776         | 998          | Quartile 2    |                                                    |                  | HI               |                                                          |                  | HI               | 46,098,591         | 2,048        |                                                                                              |                  | +                |
| Togo                              | 4,274,024          | 876          | Quartile 2    |                                                    |                  | HI               |                                                          |                  |                  | 6,502,952          | 1,184        |                                                                                              |                  |                  |
| Uganda                            | 20,550,291         | 668          | Quartile 1    |                                                    |                  |                  |                                                          |                  | HI               | 33,915,133         | 1,485        |                                                                                              |                  | +                |
| Zambia                            | 9,137,077          | 1,480        | Quartile 3    |                                                    |                  | HI               |                                                          |                  | HI               | 13,850,033         | 3,213        |                                                                                              |                  | +                |
| Zimbabwe                          | 11,320,346         | 1,814        | Quartile 4    | HI                                                 | HI               | HI               |                                                          |                  | HI               | 14,086,317         | 1,445        |                                                                                              |                  |                  |
| <b>Region totals</b>              | <b>534,439,070</b> | <b>1,486</b> |               | <b>3</b>                                           | <b>6</b>         | <b>27</b>        | <b>5</b>                                                 | <b>23</b>        | <b>25</b>        | <b>797,849,893</b> | <b>3,699</b> |                                                                                              |                  |                  |

Source: Based on UNICEF, WHO, World Bank, and NCD-RisC estimates supplemented with selected DHS and other country direct measures for the 1990s.

\* Double burden of malnutrition (DBM) = at least 1 child, adolescent, or adult in a household with a severe level of wasting/stunting/thinness and 1 with overweight/obesity (shown at 20%, 30%, or 40% adult overweight/obesity prevalence). This only includes countries with DBM data available for both time periods (1990s and 2010s).

\*\* Quartile 1 is lowest wealth; quartile 4 is highest wealth.

\*\*\* "HI" countries have DBM based on WHO-UNICEF-World Bank-defined high levels of undernutrition and overweight/obesity levels above 20%, 30% or 40% for adult women of child-bearing age.

Supplemental Table 5. Prevalence<sup>1</sup> of wasting, stunting, and overweight or obesity for children (ages 0–4 years) and annualized change in prevalence for earliest to latest survey years

| Region               | Country                           | Wasting prevalence |             |                   | Stunting prevalence |              |                   | Wasting or stunting prevalence |             |                   | Overweight or obesity prevalence |             |                   |
|----------------------|-----------------------------------|--------------------|-------------|-------------------|---------------------|--------------|-------------------|--------------------------------|-------------|-------------------|----------------------------------|-------------|-------------------|
|                      |                                   | Earliest year      | Latest year | Annualized change | Earliest year       | Latest year  | Annualized change | Earliest year                  | Latest year | Annualized change | Earliest year                    | Latest year | Annualized change |
| Sub-Saharan Africa   | Burkina Faso                      | 25.3               | 24.5        | -0.04             | 54.6                | 45.6         | -0.50             | 64.3                           | 57.0        | -0.41             | 5.7                              | 4.9         | -0.04             |
|                      | Burundi                           | —                  | 9.0         | —                 | —                   | 67.7         | —                 | —                              | 70.0        | —                 | —                                | 4.4         | —                 |
|                      | Cameroon                          | 10.9               | 9.7         | -0.10             | 43.5                | 42.6         | -0.07             | 49.3                           | 46.5        | -0.21             | 10.8                             | 10.9        | 0.01              |
|                      | Central African Republic          | 12.3               | —           | —                 | 46.8                | —            | —                 | 52.7                           | —           | —                 | 5.7                              | —           | —                 |
|                      | Chad                              | 25.5               | 21.8        | -0.21             | 59.7                | 53.9         | -0.32             | 69.0                           | 62.8        | -0.34             | 5.0                              | 5.0         | 0.00              |
|                      | Comoros                           | 14.0               | 19.1        | 0.32              | 43.7                | 39.2         | -0.28             | 50.3                           | 52.1        | 0.11              | 7.0                              | 17.0        | 0.62              |
|                      | Congo, Democratic Republic of the | 16.0               | 13.9        | -0.35             | 58.6                | 55.2         | -0.57             | 66.6                           | 61.8        | -0.81             | 15.6                             | 8.5         | -1.18             |
|                      | Congo, Republic of the            | 11.6               | 8.0         | -0.60             | <b>37.4</b>         | <b>29.3</b>  | <b>-1.36</b>      | 45.2                           | 34.8        | -1.74             | 12.2                             | 5.1         | -1.19             |
|                      | Côte d'Ivoire                     | 15.4               | 12.9        | -0.15             | 38.5                | 38.6         | 0.01              | 45.9                           | 47.1        | 0.07              | 4.1                              | 5.0         | 0.05              |
|                      | Ethiopia                          | 18.4               | 14.0        | -0.27             | <b>67.6</b>         | <b>47.6</b>  | <b>-1.25</b>      | 72.8                           | 54.7        | -1.13             | 3.2                              | 4.7         | 0.10              |
|                      | Gabon                             | 7.2                | 6.0         | -0.10             | <b>35.4</b>         | <b>22.3</b>  | <b>-1.09</b>      | 39.4                           | 25.8        | -1.13             | 9.6                              | 12.7        | 0.26              |
|                      | Gambia                            | —                  | 22.9        | —                 | —                   | 38.0         | —                 | —                              | 51.2        | —                 | —                                | 8.5         | —                 |
|                      | Ghana                             | 17.2               | 6.9         | -0.49             | 36.5                | 22.0         | -0.69             | 45.8                           | 26.4        | -0.92             | 3.9                              | 3.9         | 0.00              |
|                      | Guinea                            | 16.9               | 16.6        | -0.02             | 47.5                | 40.0         | -0.58             | 55.8                           | 49.2        | -0.51             | 8.4                              | 7.3         | -0.08             |
|                      | Kenya                             | 10.9               | 5.7         | -0.25             | <b>50.2</b>         | <b>30.9</b>  | <b>-0.92</b>      | 54.3                           | 34.2        | -0.96             | 9.6                              | 6.0         | -0.17             |
|                      | Lesotho                           | 7.9                | 4.4         | -0.36             | <b>49.1</b>         | <b>35.8</b>  | <b>-1.33</b>      | 54.2                           | 38.6        | -1.55             | 11.1                             | 10.7        | -0.04             |
|                      | Liberia                           | 11.5               | 9.1         | -0.40             | <b>47.1</b>         | <b>39.5</b>  | <b>-1.25</b>      | 53.2                           | 44.4        | -1.48             | 7.1                              | 5.9         | -0.21             |
|                      | Madagascar                        | 12.2               | 21.7        | 1.59              | 60.0                | 61.8         | 0.30              | 63.6                           | 71.9        | 1.38              | 3.9                              | 10.4        | 1.10              |
|                      | Malawi                            | 10.2               | 4.0         | -0.27             | <b>66.7</b>         | <b>42.0</b>  | <b>-1.07</b>      | 69.7                           | 44.6        | -1.09             | 14.9                             | 6.4         | -0.37             |
|                      | Mali                              | 34.7               | 20.6        | -0.78             | 42.4                | 49.7         | 0.41              | 62.0                           | 60.2        | -0.10             | 3.0                              | 5.6         | 0.15              |
|                      | Mozambique                        | 14.9               | 9.5         | -0.39             | 49.3                | 54.0         | 0.34              | 56.9                           | 59.2        | 0.16              | 7.9                              | 12.8        | 0.35              |
|                      | Namibia                           | 15.5               | 12.2        | -0.16             | <b>45.1</b>         | <b>25.7</b>  | <b>-0.92</b>      | 52.1                           | 34.2        | -0.85             | 8.5                              | 6.5         | -0.10             |
|                      | Niger                             | 30.4               | 30.5        | 0.00              | 62.3                | 59.1         | -0.16             | 71.9                           | 70.5        | -0.07             | 3.7                              | 6.1         | 0.12              |
|                      | Nigeria                           | 19.0               | 27.9        | 0.89              | 54.5                | 47.5         | -0.71             | 63.0                           | 62.0        | -0.10             | 11.8                             | 8.8         | -0.31             |
|                      | Rwanda                            | 13.0               | 3.2         | -0.70             | <b>57.2</b>         | <b>44.7</b>  | <b>-0.89</b>      | 64.6                           | 46.6        | -1.29             | 10.3                             | 11.5        | 0.08              |
|                      | Sao Tome and Principe             | —                  | 16.6        | —                 | —                   | 36.8         | —                 | —                              | 50.4        | —                 | —                                | 18.3        | —                 |
|                      | Senegal                           | 18.3               | 19.7        | 0.08              | 50.6                | 44.0         | -0.36             | 56.9                           | 53.6        | -0.18             | 9.6                              | 7.4         | -0.12             |
|                      | Sierra Leone                      | 16.0               | 15.3        | -0.13             | 46.1                | 48.8         | 0.55              | 55.9                           | 57.3        | 0.26              | 17.4                             | 15.4        | -0.40             |
|                      | South Africa                      | —                  | 3.6         | —                 | —                   | 30.6         | —                 | —                              | 33.0        | —                 | —                                | 18.0        | —                 |
|                      | Swaziland                         | —                  | 4.5         | —                 | —                   | 34.6         | —                 | —                              | 38.1        | —                 | —                                | 15.9        | —                 |
| Tanzania             | 13.3                              | 7.4                | -0.24       | 61.2              | 42.5                | -0.78        | 66.9              | 46.2                           | -0.86       | 9.6               | 6.0                              | -0.15       |                   |
| Togo                 | 18.1                              | 9.9                | -0.55       | <b>34.7</b>       | <b>32.9</b>         | <b>-0.12</b> | 45.5              | 37.9                           | -0.50       | 3.9               | 3.2                              | -0.04       |                   |
| Uganda               | 10.1                              | 6.2                | -0.19       | 55.5              | 35.4                | -0.96        | 58.8              | 39.0                           | -0.94       | 8.1               | 6.1                              | -0.09       |                   |
| Zambia               | 10.6                              | 9.4                | -0.05       | 58.0              | 49.0                | -0.41        | 62.0              | 55.1                           | -0.32       | 7.9               | 9.9                              | 0.09        |                   |
| Zimbabwe             | 7.9                               | 4.9                | -0.14       | 32.1              | 31.0                | -0.05        | 37.5              | 34.4                           | -0.15       | 9.1               | 8.4                              | -0.03       |                   |
| <b>Region totals</b> |                                   | <b>16.5</b>        | <b>14.9</b> | <b>0.05</b>       | <b>54.36</b>        | <b>44.31</b> | <b>-0.62</b>      | <b>61.4</b>                    | <b>52.0</b> | <b>-0.49</b>      | <b>8.8</b>                       | <b>8.1</b>  | <b>-0.16</b>      |

Source: All data are from the DHS (<https://dhsprogram.com>).

1. Nationally representative and regionally weighted.

**Supplemental Table 6. Prevalence<sup>1</sup> of thinness and overweight for women (ages 15–49 years) and annualized change in prevalence for earliest to latest survey years**

| Region                | Country                           | Thinness prevalence |             |                   | Overweight prevalence |             |                   |
|-----------------------|-----------------------------------|---------------------|-------------|-------------------|-----------------------|-------------|-------------------|
|                       |                                   | Earliest year       | Latest year | Annualized change | Earliest year         | Latest year | Annualized change |
|                       | Burkina Faso                      | 18.3                | 19.0        | 0.04              | 8.1                   | 13.6        | 0.31              |
|                       | Burundi                           | —                   | 19.5        | —                 | —                     | 8.4         | —                 |
|                       | Cameroon                          | 7.2                 | 8.2         | 0.07              | 21.9                  | 40.3        | 1.41              |
|                       | Central African Republic          | 16.8                | —           | —                 | 7.0                   | —           | —                 |
|                       | Chad                              | 22.4                | 20.6        | -0.10             | 5.9                   | 14.0        | 0.45              |
|                       | Comoros                           | 8.6                 | 8.1         | -0.03             | 19.1                  | 46.0        | 1.69              |
|                       | Congo, Democratic Republic of the | 21.2                | 15.2        | -1.00             | 14.5                  | 18.7        | 0.69              |
|                       | Congo, Republic of the            | 13.7                | 15.5        | 0.31              | 33.9                  | 30.6        | -0.55             |
|                       | Côte d'Ivoire                     | 10.6                | 9.1         | -0.09             | 16.3                  | 31.4        | 0.89              |
|                       | Ethiopia                          | 33.3                | 23.9        | -0.59             | 3.6                   | 8.2         | 0.28              |
|                       | Gabon                             | 7.8                 | 7.4         | -0.04             | 33.2                  | 53.1        | 1.66              |
|                       | Gambia                            | —                   | 23.0        | —                 | —                     | 34.6        | —                 |
|                       | Ghana                             | 13.0                | 6.0         | -0.33             | 13.0                  | 43.9        | 1.47              |
|                       | Guinea                            | 13.3                | 16.2        | 0.22              | 14.0                  | 24.3        | 0.80              |
|                       | Kenya                             | 10.6                | 9.8         | -0.04             | 14.8                  | 37.7        | 1.09              |
|                       | Lesotho                           | 6.4                 | 4.0         | -0.24             | 49.6                  | 52.5        | 0.30              |
|                       | Liberia                           | 11.9                | 9.1         | -0.47             | 24.1                  | 32.7        | 1.43              |
| <b>Sub-Saharan Af</b> | Madagascar                        | 20.7                | 20.9        | 0.04              | 3.9                   | 8.2         | 0.72              |
|                       | Malawi                            | 10.3                | 7.2         | -0.14             | 9.5                   | 23.6        | 0.61              |
|                       | Mali                              | 16.6                | 13.1        | -0.19             | 8.5                   | 20.5        | 0.66              |
|                       | Mozambique                        | 11.0                | 9.1         | -0.14             | 11.4                  | 18.8        | 0.52              |
|                       | Namibia                           | 16.7                | 17.2        | 0.02              | 24.1                  | 41.8        | 0.85              |
|                       | Niger                             | 21.1                | 17.8        | -0.16             | 8.9                   | 19.3        | 0.52              |
|                       | Nigeria                           | 17.3                | 12.3        | -0.51             | 25.7                  | 30.4        | 0.47              |
|                       | Rwanda                            | 9.6                 | 7.3         | -0.17             | 15.1                  | 23.6        | 0.61              |
|                       | Sao Tome and Principe             | —                   | 8.3         | —                 | —                     | 39.9        | —                 |
|                       | Senegal                           | 18.1                | 30.0        | 0.66              | 19.9                  | 34.2        | 0.79              |
|                       | Sierra Leone                      | 13.0                | 10.7        | -0.45             | 33.2                  | 23.0        | -2.05             |
|                       | South Africa                      | —                   | 3.7         | —                 | —                     | 68.1        | —                 |
|                       | Swaziland                         | —                   | 3.4         | —                 | —                     | 63.0        | —                 |
|                       | Tanzania                          | 11.0                | 10.2        | -0.03             | 11.7                  | 33.0        | 0.88              |
|                       | Togo                              | 12.4                | 8.2         | -0.28             | 12.4                  | 35.3        | 1.53              |
|                       | Uganda                            | 10.8                | 9.4         | -0.07             | 9.2                   | 27.4        | 0.87              |
|                       | Zambia                            | 12.3                | 11.2        | -0.05             | 15.8                  | 26.6        | 0.49              |
|                       | Zimbabwe                          | 5.4                 | 6.1         | 0.03              | 25.4                  | 41.4        | 0.76              |
| <b>Region totals</b>  |                                   | <b>17.1</b>         | <b>13.1</b> | <b>-0.31</b>      | <b>15.3</b>           | <b>28.4</b> | <b>0.65</b>       |

Source: All data are from the DHS (<https://dhsprogram.com>).

1. Nationally representative and regionally weighted.

Supplemental Table 7. Country overweight burdens by age, sex, and region in 1990s UNICEF and NCD-RisC surveys\* with DHS for preschoolers where gaps existed

| Region             | Country                           | Population  | GDP/capita (PPP)** | Kids (0-4) |          |            | Girls (5-18) |            | Boys (5-18) |            | Women (≥19) |            | Men (≥19) |            | Overweight burden based on anthropometry*** |                  |                  |
|--------------------|-----------------------------------|-------------|--------------------|------------|----------|------------|--------------|------------|-------------|------------|-------------|------------|-----------|------------|---------------------------------------------|------------------|------------------|
|                    |                                   |             |                    | Wasting    | Stunting | Overweight | Wasting      | Overweight | Wasting     | Overweight | Thin        | Overweight | Thin      | Overweight | > 40% overweight                            | > 30% overweight | > 20% overweight |
|                    | Angola                            | 14,268,994  | 1,798              | 8.6        | 61.7     | 1.6        | 7.2          | 4.9        | 16.2        | 1.2        | 15.3        | 20.9       | 20.8      | 10.4       |                                             |                  | HI               |
|                    | Benin                             | 5,905,558   | 1,105              | 12.3       | 39.1     | 2.4        | 6.2          | 6.4        | 15.1        | 1.9        | 11.9        | 24.3       | 14.4      | 13.2       |                                             |                  | HI               |
|                    | Botswana                          | 1,569,094   | 6,492              | 13.2       | 35.1     |            | 8.8          | 7.9        | 20.5        | 2.1        | 9.4         | 43.3       | 16.7      | 18.0       | HI                                          |                  | HI               |
|                    | Burkina Faso                      | 10,089,878  | 651                | 25.3       | 54.6     | 5.7        | 9.3          | 2.8        | 15.4        | 0.8        | 17.4        | 16.1       | 14.4      | 8.9        |                                             |                  | HI               |
|                    | Cameroon                          | 13,460,994  | 1,738              | 10.9       | 43.5     | 10.8       | 5.4          | 8.6        | 12.0        | 2.4        | 9.1         | 27.6       | 10.9      | 15.2       |                                             |                  | HI               |
|                    | Central African Republic          | 3,352,767   | 621                | 12.3       | 46.8     | 5.7        | 6.8          | 5.9        | 15.5        | 1.6        | 15.6        | 22.5       | 21.1      | 11.8       |                                             |                  | HI               |
|                    | Chad                              | 7,000,722   | 759                | 25.5       | 59.7     | 5.0        | 8.5          | 4.5        | 16.2        | 1.2        | 17.0        | 18.8       | 16.3      | 10.6       |                                             |                  | HI               |
|                    | Comoros                           | 475,394     | 1,048              | 14.0       | 43.7     | 7.0        | 5.2          | 6.8        | 11.8        | 2.3        | 11.8        | 23.9       | 14.9      | 13.1       |                                             |                  | HI               |
|                    | Côte d'Ivoire                     | 14,540,820  | 2,113              | 15.4       | 38.5     | 4.1        | 5.0          | 7.7        | 13.0        | 2.5        | 10.6        | 26.1       | 12.0      | 14.7       |                                             |                  | HI               |
|                    | Congo, Democratic Republic of the | 41,595,744  | 578                | 11.4       | 51.0     |            | 8.0          | 4.9        | 18.1        | 1.2        | 17.5        | 20.1       | 23.1      | 10.3       |                                             |                  | HI               |
|                    | Equatorial Guinea                 | 504,871     | 1,251              | 4.0        | 38.7     | 3.4        | 6.9          | 5.8        | 15.7        | 1.6        | 13.3        | 23.9       | 20.2      | 12.0       |                                             |                  | HI               |
|                    | Eritrea                           | 3,090,159   | 1,156              | 11.8       | 69.6     |            | 7.7          | 5.2        | 13.9        | 1.4        | 21.8        | 17.0       | 21.0      | 9.8        |                                             |                  | HI               |
|                    | Ethiopia                          | 57,309,880  | 419                | 9.2        | 66.9     |            | 9.0          | 4.1        | 15.9        | 1.2        | 19.2        | 16.8       | 20.1      | 9.0        |                                             |                  | HI               |
|                    | Gambia                            | 1,066,223   | 1,048              |            | 36.1     |            | 7.6          | 6.6        | 15.1        | 2.1        | 13.3        | 24.4       | 15.2      | 13.4       |                                             |                  | HI               |
|                    | Ghana                             | 16,760,467  | 1,506              | 17.2       | 36.5     | 3.9        | 5.7          | 6.6        | 14.6        | 1.8        | 10.1        | 26.6       | 14.9      | 12.9       |                                             |                  | HI               |
|                    | Guinea                            | 7,871,173   | 957                | 16.9       | 47.5     | 8.4        | 7.4          | 5.3        | 15.2        | 1.4        | 13.7        | 21.7       | 15.2      | 11.6       |                                             |                  | HI               |
| Sub-Saharan Africa | Kenya                             | 27,346,456  | 1,607              | 10.9       | 50.2     | 9.6        | 6.3          | 5.6        | 13.4        | 1.6        | 14.1        | 20.7       | 17.3      | 10.3       |                                             |                  | HI               |
|                    | Lesotho                           | 1,761,359   | 1,187              | 3.2        | 39.2     |            | 6.7          | 5.4        | 20.5        | 0.8        | 7.8         | 36.9       | 16.0      | 12.3       | HI                                          |                  | HI               |
|                    | Madagascar                        | 13,475,400  | 1,021              | 12.2       | 60.0     | 3.9        | 6.6          | 5.1        | 12.0        | 2.0        | 19.2        | 18.2       | 18.0      | 11.1       |                                             |                  | HI               |
|                    | Malawi                            | 9,909,088   | 598                | 10.2       | 66.7     | 14.9       | 4.6          | 5.0        | 12.6        | 1.4        | 13.1        | 19.1       | 16.0      | 10.0       |                                             |                  | HI               |
|                    | Mali                              | 9,604,450   | 955                | 34.7       | 42.4     | 3.0        | 7.1          | 5.2        | 16.7        | 1.4        | 13.9        | 20.8       | 15.0      | 11.4       |                                             |                  | HI               |
|                    | Mauritania                        | 2,327,075   | 2,087              | 17.4       | 54.8     | 6.8        | 6.8          | 7.7        | 16.9        | 2.5        | 11.0        | 27.8       | 14.2      | 15.0       |                                             |                  | HI               |
|                    | Mozambique                        | 15,759,132  | 272                | 14.9       | 49.3     | 7.9        | 3.1          | 7.3        | 6.1         | 2.5        | 13.8        | 21.6       | 16.1      | 11.9       |                                             |                  | HI               |
|                    | Namibia                           | 1,655,359   | 4,298              | 15.5       | 45.1     | 8.5        | 13.6         | 5.1        | 22.6        | 1.4        | 13.0        | 35.9       | 16.1      | 15.1       | HI                                          |                  | HI               |
|                    | Niger                             | 9,477,333   | 572                | 30.4       | 62.3     | 3.7        | 9.3          | 3.8        | 18.3        | 1.0        | 16.6        | 17.9       | 16.8      | 9.4        |                                             |                  | HI               |
|                    | Nigeria                           | 108,011,465 | 2,005              | 11.8       | 50.5     | 3.2        | 11.1         | 3.9        | 19.6        | 1.4        | 13.4        | 22.0       | 15.1      | 12.4       |                                             |                  | HI               |
|                    | Rwanda                            | 5,928,078   | 495                | 5.0        | 56.8     | 4.0        | 4.5          | 5.0        | 12.7        | 1.1        | 12.5        | 18.5       | 16.2      | 8.7        |                                             |                  | HI               |
|                    | Senegal                           | 8,746,606   | 1,287              | 18.3       | 50.6     | 9.6        | 9.0          | 6.2        | 17.3        | 1.8        | 13.5        | 24.5       | 16.1      | 12.9       |                                             |                  | HI               |
|                    | Sierra Leone                      | 4,274,810   | 697                | 10.2       | 40.9     |            | 7.7          | 6.4        | 15.0        | 1.8        | 12.9        | 23.7       | 14.6      | 12.3       |                                             |                  | HI               |
|                    | South Africa                      | 41,426,810  | 6,586              |            | 31.5     |            | 15.8         | 6.4        | 25.9        | 2.1        | 4.4         | 54.0       | 10.6      | 25.9       | HI                                          | HI               | HI               |
|                    | Tanzania                          | 29,960,776  | 998                | 13.3       | 61.2     | 9.6        | 5.6          | 5.7        | 12.3        | 1.8        | 14.2        | 21.2       | 15.9      | 12.0       |                                             |                  | HI               |
|                    | Togo                              | 4,274,024   | 876                | 18.1       | 34.7     | 3.9        | 5.4          | 5.6        | 15.4        | 1.6        | 12.5        | 22.5       | 14.3      | 12.0       |                                             |                  | HI               |
|                    | Uganda                            | 20,550,291  | 668                | 10.1       | 55.5     | 8.1        | 3.9          | 5.4        | 11.3        | 1.1        | 14.3        | 18.7       | 15.4      | 9.3        |                                             |                  | HI               |
|                    | Zambia                            | 9,137,077   | 1,480              | 10.6       | 58.0     | 7.9        | 4.6          | 7.8        | 11.3        | 3.0        | 11.5        | 25.5       | 17.1      | 13.5       |                                             |                  | HI               |
|                    | Zimbabwe                          | 11,320,346  | 1,814              | 7.9        | 32.1     | 9.1        | 6.6          | 6.8        | 19.6        | 1.3        | 6.9         | 40.8       | 14.5      | 15.1       | HI                                          | HI               | HI               |
| Region totals      |                                   | 533,808,682 |                    | 12.0       | 51.1     | 4.3        | 8.3          | 5.3        | 16.5        | 1.6        | 13.7        | 24.2       | 16.3      | 12.6       | 3.0                                         | 5.0              | 26.0             |

Sources: UNICEF-WHO-The World Bank 2017; NCD-RisC; and Stevens et al. 2013 to supplement DHS measures for missing preschooler data.

\* NCD-RisC data obtained April 2019

\*\* GDP per capita based on PPP (purchasing power parity using the current international \$) from World Bank indicators

\*\*\* "HI" countries have DBM based on WHO-UNICEF-World Bank-defined high levels of undernutrition and overweight/obesity levels above 20%, 30% or 40% for adult women of child-bearing age.

Supplemental Table 8. Country overweight burdens by age, sex, and region in 2010s UNICEF and NCD-RisC surveys\* with DHS for preschoolers where gaps existed

| Region                                  | Country                           | Population         | GDP/capita (PPP)** | Kids (0-4) |             |            | Girls (5-18) |             | Boys (5-18) |            | Women (19+) |             | Men (19+)   |             | Overweight burden based on anthropometry*** |                     |                     |
|-----------------------------------------|-----------------------------------|--------------------|--------------------|------------|-------------|------------|--------------|-------------|-------------|------------|-------------|-------------|-------------|-------------|---------------------------------------------|---------------------|---------------------|
|                                         |                                   |                    |                    | Wasting    | Stunting    | Overweight | Wasting      | Overweight  | Wasting     | Overweight | Thin        | Overweight  | Thin        | Overweight  | > 40%<br>overweight                         | > 30%<br>overweight | > 20%<br>overweight |
|                                         | Angola                            | 23,369,131         | 5,778              | 4.9        | 37.6        | 3.3        | 5.2          | 14.8        | 11.2        | 6.9        | 10.6        | 36.1        | 15.9        | 20.3        |                                             | HI                  | HI                  |
|                                         | Benin                             | 9,199,259          | 1,782              | 4.5        | 34.0        | 1.7        | 3.8          | 15.5        | 9.8         | 7.0        | 8.4         | 38.6        | 10.3        | 22.0        |                                             | HI                  | HI                  |
|                                         | Botswana                          | 2,014,866          | 13,064             | 7.2        | 31.4        | 11.2       | 2.9          | 24.6        | 9.6         | 10.4       | 6.2         | 58.3        | 11.6        | 30.8        | HI                                          | HI                  | HI                  |
|                                         | Burkina Faso                      | 15,605,217         | 1,395              | 7.6        | 27.3        | 1.2        | 5.6          | 10.1        | 9.9         | 5.1        | 12.5        | 30.3        | 10.4        | 16.7        |                                             |                     |                     |
|                                         | Burundi                           | 8,766,930          | 748                | 6.1        | 57.5        | 2.9        | 4.8          | 14.2        | 9.7         | 6.2        | 10.9        | 31.1        | 14.0        | 14.5        |                                             | HI                  | HI                  |
|                                         | Cabo Verde                        | 502,384            | 5,710              | 6.9        | 21.4        |            | 4.1          | 16.3        | 9.2         | 8.6        | 6.9         | 42.8        | 8.2         | 28.5        |                                             |                     |                     |
|                                         | Cameroon                          | 19,970,495         | 2,871              | 5.2        | 31.7        | 6.7        | 3.1          | 17.4        | 7.8         | 7.9        | 6.0         | 43.0        | 7.0         | 26.2        | HI                                          | HI                  | HI                  |
|                                         | Central African Republic          | 4,448,525          | 863                | 7.4        | 40.7        | 1.8        | 5.2          | 14.5        | 11.3        | 6.6        | 12.0        | 34.4        | 17.2        | 19.1        |                                             | HI                  | HI                  |
|                                         | Chad                              | 11,887,202         | 1,886              | 13.0       | 39.9        | 2.5        | 5.8          | 11.8        | 10.9        | 5.4        | 13.0        | 30.9        | 12.9        | 16.6        |                                             | HI                  | HI                  |
|                                         | Comoros                           | 689,692            | 1,384              | 11.1       | 32.1        | 10.9       | 4.0          | 16.9        | 9.0         | 7.3        | 8.2         | 36.9        | 11.6        | 19.0        |                                             | HI                  | HI                  |
|                                         | Congo, Republic of the            | 4,386,693          | 5,081              | 8.2        | 21.2        | 5.9        | 4.7          | 13.7        | 9.9         | 7.8        | 11.1        | 38.7        | 14.5        | 25.2        |                                             |                     |                     |
|                                         | Côte d'Ivoire                     | 20,401,331         | 2,636              | 7.6        | 29.6        | 3.2        | 2.8          | 16.9        | 8.1         | 8.8        | 7.3         | 40.8        | 7.9         | 25.5        |                                             |                     |                     |
|                                         | Congo, Democratic Republic of the | 64,523,263         | 647                | 8.1        | 42.6        | 4.4        | 5.7          | 14.0        | 13.0        | 6.1        | 12.9        | 33.2        | 18.5        | 18.7        |                                             | HI                  | HI                  |
|                                         | Djibouti                          | 851,146            | 1,326              | 21.5       | 33.5        | 8.1        | 3.6          | 21.3        | 7.4         | 12.9       | 7.1         | 46.1        | 8.5         | 33.6        | HI                                          | HI                  | HI                  |
|                                         | Equatorial Guinea                 | 951,104            | 33,041             | 3.1        | 26.2        | 9.7        | 5.2          | 14.6        | 11.3        | 6.6        | 9.8         | 36.7        | 16.2        | 19.5        |                                             |                     |                     |
|                                         | Eritrea                           | 4,390,840          | 1,388              | 15.3       | 50.3        | 1.9        | 5.9          | 15.2        | 10.5        | 6.3        | 16.6        | 29.3        | 17.5        | 15.4        |                                             |                     | HI                  |
|                                         | Ethiopia                          | 87,702,670         | 1,052              | 9.9        | 38.4        | 2.8        | 7.2          | 12.5        | 13.4        | 4.6        | 14.2        | 29.0        | 16.7        | 14.0        |                                             |                     | HI                  |
|                                         | Gabon                             | 1,640,210          | 15,045             | 3.4        | 17.5        | 7.7        | 3.3          | 19.5        | 8.6         | 11.5       | 6.5         | 48.0        | 10.6        | 35.1        |                                             |                     |                     |
|                                         | Gambia (The)                      | 1,692,149          | 1,611              | 11.1       | 25.0        | 3.2        | 4.9          | 15.1        | 9.5         | 8.1        | 9.2         | 40.2        | 10.0        | 25.5        |                                             |                     |                     |
|                                         | Ghana                             | 24,512,104         | 2,997              | 4.7        | 18.8        | 2.6        | 3.2          | 15.1        | 9.0         | 6.3        | 6.8         | 42.3        | 10.0        | 23.0        |                                             |                     |                     |
|                                         | Guinea                            | 10,794,170         | 1,542              | 15.6       | 41.5        | 10.2       | 4.7          | 13.4        | 9.8         | 5.5        | 9.8         | 35.4        | 11.2        | 19.5        |                                             | HI                  | HI                  |
|                                         | Guinea-Bissau                     | 1,555,880          | 1,372              | 6.0        | 27.6        | 2.3        | 4.2          | 14.5        | 9.9         | 7.1        | 8.7         | 38.5        | 9.9         | 23.1        |                                             |                     |                     |
|                                         | Kenya                             | 41,350,152         | 2,426              | 4.0        | 26.0        | 4.1        | 4.7          | 16.2        | 10.5        | 6.2        | 9.4         | 35.5        | 13.7        | 16.8        |                                             |                     |                     |
| <b>Sub-Saharan Africa</b>               | Lesotho                           | 2,040,551          | 2,318              | 2.8        | 33.2        | 7.4        | 1.6          | 24.7        | 9.1         | 6.2        | 4.3         | 55.3        | 11.5        | 22.0        | HI                                          | HI                  | HI                  |
|                                         | Liberia                           | 3,948,125          | 686                | 5.6        | 32.1        | 3.2        | 3.5          | 14.2        | 9.2         | 6.1        | 7.6         | 39.6        | 8.2         | 24.1        |                                             | HI                  | HI                  |
|                                         | Madagascar                        | 21,151,640         | 1,358              | 21.7       | 49.2        | 10.4       | 5.3          | 13.4        | 8.8         | 7.9        | 14.4        | 30.7        | 13.9        | 18.5        |                                             | HI                  | HI                  |
|                                         | Malawi                            | 15,167,095         | 1,012              | 4.0        | 42.0        | 6.3        | 3.0          | 14.8        | 9.5         | 6.3        | 8.8         | 32.6        | 12.6        | 15.4        |                                             | HI                  | HI                  |
|                                         | Mali                              | 15,075,085         | 1,834              | 14.6       | 37.5        | 3.9        | 4.3          | 14.6        | 10.7        | 6.7        | 9.4         | 36.4        | 10.5        | 21.2        |                                             | HI                  | HI                  |
|                                         | Mauritania                        | 3,609,543          | 3,250              | 14.8       | 27.9        | 1.3        | 4.2          | 17.4        | 11.0        | 9.0        | 7.5         | 43.8        | 9.4         | 27.0        |                                             |                     |                     |
|                                         | Mauritius                         | 1,250,400          | 15,616             | 15.7       | 13.6        | 6.5        | 4.8          | 18.4        | 8.9         | 11.2       | 6.9         | 41.2        | 8.7         | 25.3        | HI                                          | HI                  | HI                  |
|                                         | Mozambique                        | 24,221,405         | 899                | 6.1        | 43.1        | 7.9        | 2.8          | 17.0        | 4.2         | 7.8        | 9.7         | 34.8        | 12.2        | 18.7        |                                             | HI                  | HI                  |
|                                         | Namibia                           | 2,173,170          | 8,290              | 7.1        | 23.1        | 4.1        | 5.5          | 20.8        | 10.8        | 9.8        | 8.1         | 53.6        | 10.8        | 28.3        |                                             |                     |                     |
|                                         | Niger (The)                       | 16,425,578         | 798                | 18.7       | 43.0        | 3.0        | 6.2          | 11.3        | 12.5        | 5.0        | 12.3        | 30.7        | 13.3        | 15.2        |                                             | HI                  | HI                  |
|                                         | Nigeria                           | 158,578,261        | 5,046              | 10.7       | 44.5        | 3.4        | 7.6          | 10.3        | 11.6        | 6.5        | 9.3         | 37.4        | 10.6        | 22.6        |                                             | HI                  | HI                  |
|                                         | Rwanda                            | 10,246,842         | 1,338              | 2.2        | 37.9        | 7.7        | 2.8          | 16.9        | 8.8         | 5.2        | 7.4         | 34.7        | 11.5        | 16.2        |                                             | HI                  | HI                  |
|                                         | Sao Tome And Principe             | 174,776            | 2,588              | 4.0        | 17.2        | 2.4        | 2.6          | 16.6        | 8.1         | 9.5        | 7.3         | 43.0        | 6.7         | 29.3        |                                             |                     |                     |
|                                         | Senegal                           | 12,916,229         | 2,140              | 7.8        | 20.5        | 1.0        | 6.3          | 13.4        | 12.4        | 5.7        | 10.3        | 37.1        | 12.2        | 20.3        |                                             |                     |                     |
|                                         | Sierra Leone                      | 6,458,720          | 1,176              | 9.4        | 37.9        | 8.9        | 4.8          | 15.1        | 9.7         | 6.3        | 9.3         | 37.2        | 10.6        | 19.9        |                                             | HI                  | HI                  |
|                                         | Somalia                           | 12,053,223         | 1,176              | 15.0       | 25.3        | 3.0        | 4.3          | 17.2        | 8.7         | 8.4        | 9.1         | 37.2        | 11.7        | 21.1        |                                             | HI                  | HI                  |
|                                         | South Africa                      | 50,979,432         | 11,647             | 3.6        | 30.6        | 18.0       | 3.4          | 29.4        | 6.0         | 20.2       | 2.7         | 67.2        | 6.2         | 42.0        |                                             |                     |                     |
|                                         | Sudan (The)                       | 34,385,963         | 3,298              | 16.3       | 38.2        | 3.0        | 4.3          | 16.7        | 8.9         | 8.0        | 7.9         | 37.3        | 11.1        | 20.5        |                                             | HI                  | HI                  |
|                                         | Swaziland                         | 1,202,843          | 7,149              | 2.0        | 25.5        | 9.0        | 1.9          | 25.0        | 6.2         | 8.3        | 4.9         | 54.3        | 9.4         | 23.1        |                                             |                     |                     |
|                                         | Tanzania                          | 46,098,591         | 2,048              | 7.4        | 42.5        | 5.9        | 4.1          | 16.1        | 9.0         | 7.5        | 9.6         | 36.7        | 11.9        | 20.4        |                                             | HI                  | HI                  |
|                                         | Togo                              | 6,502,952          | 1,184              | 6.7        | 27.5        | 2.0        | 2.8          | 14.0        | 9.9         | 6.5        | 8.6         | 37.0        | 10.3        | 20.4        |                                             |                     |                     |
|                                         | Uganda                            | 33,915,133         | 1,485              | 6.2        | 35.4        | 6.1        | 2.9          | 16.0        | 8.1         | 4.5        | 9.9         | 31.9        | 11.9        | 14.3        |                                             | HI                  | HI                  |
|                                         | Zambia                            | 13,850,033         | 3,213              | 6.3        | 40.0        | 6.2        | 3.7          | 16.7        | 8.6         | 8.4        | 8.5         | 37.6        | 13.3        | 19.8        |                                             | HI                  | HI                  |
|                                         | Zimbabwe                          | 14,086,317         | 1,445              | 4.9        | 31.0        | 8.4        | 1.9          | 22.3        | 9.1         | 6.5        | 4.6         | 54.5        | 10.7        | 23.1        | HI                                          | HI                  | HI                  |
| <b>Region Total: Sub-Saharan Africa</b> |                                   | <b>867,717,320</b> |                    | <b>8.8</b> | <b>37.5</b> | <b>5.2</b> | <b>5.2</b>   | <b>15.0</b> | <b>10.2</b> | <b>7.3</b> | <b>9.7</b>  | <b>37.6</b> | <b>12.3</b> | <b>20.9</b> | <b>6</b>                                    | <b>28</b>           | <b>30</b>           |

Sources: UNICEF-WHO-The World Bank 2017; NCD-RisC; and Stevens et al. 2013 to supplement DHS measures for missing preschooler data.

\* NCD-RisC data obtained April 2019

\*\* GDP per capita based on PPP (purchasing power parity using the current international \$) from World Bank indicators

\*\*\* "HI" countries have DBM based on WHO-UNICEF-World Bank-defined high levels of undernutrition and overweight/obesity levels above 20%, 30% or 40% for adult women of child-bearing age.



Supplemental Table 9. Prevalence<sup>1</sup> of overweight and obesity for lowest- and highest-wealth quintiles, differences in the earliest and latest years, and annualized changes in disparity

| Region               | Country                           | Earliest year quintiles |                    |                    |              | Most recent year quintiles |                    |                    |              | Annualized change (diff of diff) | Annualized change |                  |
|----------------------|-----------------------------------|-------------------------|--------------------|--------------------|--------------|----------------------------|--------------------|--------------------|--------------|----------------------------------|-------------------|------------------|
|                      |                                   | Year                    | Poorest prevalence | Richest prevalence | Difference   | Year                       | Poorest prevalence | Richest prevalence | Difference   |                                  | Poorest quintile  | Richest quintile |
| Sub-Saharan Africa   | Burkina Faso                      | 1992                    | 4.8                | 22.0               | -17.2        | 2010.0                     | 4.5                | 39.3               | -34.8        | -1.0                             | 0.0               | 1.0              |
|                      | Burundi                           |                         |                    |                    |              | 2010.0                     | 4.0                | 24.8               | -20.9        |                                  |                   |                  |
|                      | Cameroon                          | 1998                    | 8.8                | 39.4               | -30.7        | 2011.0                     | 12.1               | 61.4               | -49.3        | -1.4                             | 0.3               | 1.7              |
|                      | Central African Republic          | 1994                    | 4.2                | 17.3               | -13.1        |                            |                    |                    |              |                                  |                   |                  |
|                      | Chad                              | 1996                    | 2.7                | 17.7               | -15.0        | 2014.0                     | 8.8                | 33.9               | -25.1        | -0.6                             | 0.3               | 0.9              |
|                      | Comoros                           | 1996                    | 17.1               | 28.5               | -11.4        | 2012.0                     | 34.3               | 57.5               | -23.2        | -0.7                             | 1.1               | 1.8              |
|                      | Congo, Democratic Republic of the | 2007                    | 9.3                | 40.5               | -31.2        | 2013.0                     | 7.4                | 47.6               | -40.3        | -1.5                             | -0.3              | 1.2              |
|                      | Congo, Republic of the            | 2005                    | 17.4               | 53.9               | -36.5        | 2011.0                     | 13.6               | 57.4               | -43.8        | -1.2                             | -0.6              | 0.6              |
|                      | Côte d'Ivoire                     | 1994                    | 5.6                | 33.4               | -27.8        | 2011.0                     | 13.4               | 54.7               | -41.2        | -0.8                             | 0.5               | 1.3              |
|                      | Ethiopia                          | 2000                    | 1.3                | 11.2               | -10.0        | 2016.0                     | 2.9                | 23.8               | -20.9        | -0.7                             | 0.1               | 0.8              |
|                      | Gabon                             | 2000                    | 16.5               | 46.5               | -30.0        | 2012.0                     | 35.5               | 60.6               | -25.0        | 0.4                              | 1.6               | 1.2              |
|                      | Gambia                            |                         |                    |                    |              | 2013.0                     | 23.3               | 51.6               | -28.3        |                                  |                   |                  |
|                      | Ghana                             | 1993                    | 5.5                | 29.8               | -24.3        | 2014.0                     | 16.7               | 63.9               | -47.2        | -1.1                             | 0.5               | 1.6              |
|                      | Guinea                            | 1999                    | 5.7                | 37.0               | -31.3        | 2012.0                     | 7.6                | 51.0               | -43.4        | -0.9                             | 0.2               | 1.1              |
|                      | Kenya                             | 1993                    | 9.6                | 29.5               | -19.9        | 2014.0                     | 13.6               | 58.9               | -45.3        | -1.2                             | 0.2               | 1.4              |
|                      | Lesotho                           | 2004                    | 32.9               | 64.9               | -32.0        | 2014.0                     | 29.6               | 64.3               | -34.7        | -0.3                             | -0.3              | -0.1             |
|                      | Liberia                           | 2007                    | 11.5               | 45.1               | -33.7        | 2013.0                     | 19.5               | 51.7               | -32.2        | 0.3                              | 1.4               | 1.1              |
|                      | Madagascar                        | 1997                    | 2.7                | 12.3               | -9.6         | 2003.0                     | 3.2                | 17.2               | -14.0        | -0.7                             | 0.1               | 0.8              |
|                      | Malawi                            | 1992                    | 4.1                | 18.9               | -14.7        | 2015.0                     | 13.4               | 42.7               | -29.4        | -0.6                             | 0.4               | 1.0              |
|                      | Mali                              | 1995                    | 4.0                | 25.5               | -21.5        | 2013.0                     | 13.2               | 42.8               | -29.6        | -0.5                             | 0.5               | 1.0              |
|                      | Mozambique                        | 1997                    | 4.3                | 30.7               | -26.4        | 2011.0                     | 6.6                | 48.2               | -41.7        | -1.1                             | 0.2               | 1.3              |
|                      | Namibia                           | 1992                    | 10.3               | 50.6               | -40.3        | 2013.0                     | 17.3               | 61.7               | -44.4        | -0.2                             | 0.3               | 0.5              |
|                      | Niger                             | 1998                    | 3.9                | 30.6               | -26.8        | 2012.0                     | 11.2               | 43.6               | -32.3        | -0.4                             | 0.5               | 0.9              |
|                      | Nigeria                           | 2003                    | 13.0               | 45.2               | -32.2        | 2013.0                     | 12.5               | 50.3               | -37.8        | -0.6                             | -0.1              | 0.5              |
|                      | Rwanda                            | 2000                    | 10.5               | 28.4               | -17.9        | 2014.0                     | 11.7               | 45.6               | -33.9        | -1.1                             | 0.1               | 1.2              |
|                      | Sao Tome and Principe             |                         |                    |                    |              | 2008.0                     | 31.2               | 51.6               | -20.5        |                                  |                   |                  |
|                      | Senegal                           | 2005                    | 15.5               | 61.1               | -45.6        | 2010.0                     | 17.2               | 45.3               | -28.1        | 3.5                              | 0.3               | -3.2             |
|                      | Sierra Leone                      | 2008                    | 27.0               | 49.9               | -22.9        | 2013.0                     | 12.5               | 45.5               | -33.1        | -2.0                             | -2.9              | -0.9             |
|                      | South Africa                      |                         |                    |                    |              | 2016.0                     | 63.5               | 67.6               | -4.1         |                                  |                   |                  |
|                      | Swaziland                         |                         |                    |                    |              | 2006.0                     | 49.4               | 70.7               | -21.2        |                                  |                   |                  |
|                      | Tanzania                          | 1996                    | 7.2                | 31.8               | -24.7        | 2015.0                     | 14.7               | 59.8               | -45.1        | -1.1                             | 0.4               | 1.5              |
|                      | Togo                              | 1998                    | 6.1                | 31.8               | -25.7        | 2013.0                     | 14.6               | 60.0               | -45.4        | -1.3                             | 0.6               | 1.9              |
| Uganda               | 1995                              | 4.9                     | 19.3               | -14.4              | 2016.0       | 9.8                        | 52.4               | -42.6              | -1.3         | 0.2                              | 1.6               |                  |
| Zambia               | 1996                              | 7.0                     | 23.8               | -16.9              | 2014.0       | 10.2                       | 49.2               | -39.0              | -1.2         | 0.2                              | 1.4               |                  |
| Zimbabwe             | 1994                              | 15.2                    | 39.2               | -24.0              | 2015.0       | 23.4                       | 61.2               | -37.8              | -0.7         | 0.4                              | 1.0               |                  |
| <b>Region totals</b> |                                   |                         | <b>8.1</b>         | <b>32.2</b>        | <b>-24.1</b> |                            | <b>14.3</b>        | <b>48.3</b>        | <b>-34.1</b> | <b>-0.8</b>                      | <b>0.1</b>        | <b>0.9</b>       |

Source: All data are from the DHS (<https://dhsprogram.com>).

1. All data weighted to be nationally representative.
